# Supplementary material for: Antimicrobial Activity of the Secondary Metabolites Isolated from a South African Red Seaweed, Laurencia corymbosa
Source: MDPI journal article supplement (doi:10.3390/molecules28052063), 2023-02-22
Supplement: s1 [file s1]

Supplementary information

# Antimicrobial activity of the secondary metabolites isolated from a South African *Laurencia corymbosa*.

Jameel Fakee<sup>1</sup>, John J. Bolton<sup>2</sup>, Marilize Le Roes-Hill<sup>3</sup>, Kim A. Durrell<sup>3</sup>, Edith Antunes<sup>4</sup>, and Denzil R. Beukes<sup>5,\*</sup>

<sup>1</sup> Faculty of Pharmacy, Rhodes University, Makhanda (Grahamstown), 6140, South Africa

<sup>2</sup> Department of Biological Sciences, University of Cape Town, Rondebosch, 7701, South Africa

<sup>3</sup> Biocatalysis and Technical Biology Research Group, Institute of Biomedical and Microbial Biotechnology, Cape Peninsula University of Technology, Bellville, 7535, South Africa

<sup>4</sup> Department of Chemistry, University of the Western Cape, Bellville, 7535, South Africa

<sup>5</sup> School of Pharmacy, University of the Western Cape, Bellville, 7535, South Africa

\* Correspondence: dbeukes@uwc.ac.za; Tel.: +27219592352

## Contents

|                                                                                                                                                                                                                                                                                                   |    |
|---------------------------------------------------------------------------------------------------------------------------------------------------------------------------------------------------------------------------------------------------------------------------------------------------|----|
| Figure S1. Images of <i>Laurencia corymbosa</i> (Francis, 2014) (a) habit, (b) cross section through the thallus with the outermost cortical cells and spaces between medullary and cortical cells in view and (c) cortical cells showing one corps en cerise per cell (40x magnification). ..... | 5  |
| Scheme S1. Isolation of compounds 1-8 from <i>L. corymbosa</i> .....                                                                                                                                                                                                                              | 6  |
| Figure S2. <sup>1</sup> H NMR spectrum (CDCl <sub>3</sub> , 600 MHz) of compound 1 .....                                                                                                                                                                                                          | 7  |
| Figure S3. <sup>13</sup> C NMR spectrum (CDCl <sub>3</sub> , 150 MHz) of compound 1 .....                                                                                                                                                                                                         | 7  |
| Figure S4. <sup>1</sup> H- <sup>1</sup> H COSY correlations of compound 1 .....                                                                                                                                                                                                                   | 8  |
| Figure S5. Partial multiplicity-edited HSQC spectrum of compound 1 showing methylene correlations.....                                                                                                                                                                                            | 8  |
| Figure S6. Partial HMBC spectrum of compound 1 showing key correlations.....                                                                                                                                                                                                                      | 8  |
| Figure S7. Partial HMBC spectrum of compound 1 showing key correlations.....                                                                                                                                                                                                                      | 9  |
| Figure S8. NOESY NMR spectrum (CDCl <sub>3</sub> , 600 MHz) of compound 1 .....                                                                                                                                                                                                                   | 9  |
| <b>1.2 Compound 1a</b> .....                                                                                                                                                                                                                                                                      | 10 |
| Table S1. NMR spectroscopic data of compound 1a .....                                                                                                                                                                                                                                             | 10 |
| Figure S9. <sup>1</sup> H NMR spectrum (CDCl <sub>3</sub> , 600 MHz) of compound 1a .....                                                                                                                                                                                                         | 10 |
| <b>1.3 Compound 1b</b> .....                                                                                                                                                                                                                                                                      | 11 |
| Table S2. NMR spectroscopic data of compound 1b .....                                                                                                                                                                                                                                             | 11 |
| Figure S10. <sup>1</sup> H NMR spectrum (CDCl <sub>3</sub> , 600 MHz) of compound 1b .....                                                                                                                                                                                                        | 11 |
| Figure S11. <sup>13</sup> C NMR spectrum (CDCl <sub>3</sub> , 150 MHz) of compound 1b .....                                                                                                                                                                                                       | 12 |
| <b>1.4 Compound 2</b> .....                                                                                                                                                                                                                                                                       | 12 |
| Table S3. NMR spectroscopic data of compound 2 .....                                                                                                                                                                                                                                              | 12 |
| Figure S12. <sup>1</sup> H NMR spectrum (CDCl <sub>3</sub> , 600 MHz) of compound 2 .....                                                                                                                                                                                                         | 13 |
| Figure S13. <sup>13</sup> C NMR spectrum (CDCl <sub>3</sub> , 600 MHz) of compound 2 .....                                                                                                                                                                                                        | 13 |
| <b>1.5 Compound 3</b> .....                                                                                                                                                                                                                                                                       | 14 |
| Table S4. NMR spectroscopic data of compound 3 .....                                                                                                                                                                                                                                              | 14 |
| Figure S14. <sup>1</sup> H NMR spectrum (CDCl <sub>3</sub> , 600 MHz) of compound 3 .....                                                                                                                                                                                                         | 14 |
| Figure S15. <sup>13</sup> C NMR spectrum (CDCl <sub>3</sub> , 150 MHz) of compound 3 .....                                                                                                                                                                                                        | 15 |
| Figure S16. NOESY NMR spectrum (CDCl <sub>3</sub> , 600 MHz) of compound 3 .....                                                                                                                                                                                                                  | 15 |
| <b>1.4 Compound 4</b> .....                                                                                                                                                                                                                                                                       | 16 |
| Figure S17. <sup>1</sup> H NMR spectrum (CDCl <sub>3</sub> , 600 MHz) of compound 4 .....                                                                                                                                                                                                         | 16 |
| Figure S18. <sup>13</sup> C NMR spectrum (CDCl <sub>3</sub> , 150 MHz) of compound 4 .....                                                                                                                                                                                                        | 16 |
| Figure S19. COSY NMR spectrum (CDCl <sub>3</sub> , 600 MHz) of compound 4 .....                                                                                                                                                                                                                   | 17 |

|                                                                                                                                                 |    |
|-------------------------------------------------------------------------------------------------------------------------------------------------|----|
| Figure S20. HSQC NMR spectrum (CDCl <sub>3</sub> , 600 MHz) of compound 4 .....                                                                 | 17 |
| Figure S21. HMBC NMR spectrum (CDCl <sub>3</sub> , 600 MHz) of compound 4 .....                                                                 | 18 |
| Figure S22. Partial HMBC spectrum of compound 4 showing key correlations.....                                                                   | 18 |
| Figure S23. NOESY NMR spectrum (CDCl <sub>3</sub> , 600 MHz) of compound 4.....                                                                 | 19 |
| Figure S24. HRGCEIMS spectra of compound 4 .....                                                                                                | 19 |
| <b>1.5 Compound 4a</b> .....                                                                                                                    | 20 |
| Table S5. NMR spectroscopic data of compound 4a.....                                                                                            | 20 |
| Figure S25. <sup>1</sup> H NMR spectrum (CDCl <sub>3</sub> , 600 MHz) of compound 4a.....                                                       | 20 |
| Figure S26. <sup>13</sup> C NMR spectrum (CDCl <sub>3</sub> , 150 MHz) of compound 4a .....                                                     | 21 |
| Figure S27. Expansion of the HRESIMS spectrum of compound 4a.....                                                                               | 21 |
| <b>1.6 Compound 5</b> .....                                                                                                                     | 22 |
| Figure S28. <sup>1</sup> H NMR spectrum (CDCl <sub>3</sub> , 600 MHz) of compound 5.....                                                        | 22 |
| Figure S29. <sup>13</sup> C NMR spectrum (CDCl <sub>3</sub> , 150 MHz) of compound 5 .....                                                      | 22 |
| Figure S30. COSY NMR spectrum (CDCl <sub>3</sub> , 600 MHz) of compound 5.....                                                                  | 23 |
| Figure S31. HSQC NMR spectrum (CDCl <sub>3</sub> , 600 MHz) of compound 5 .....                                                                 | 23 |
| Figure S32. HMBC NMR spectrum (CDCl <sub>3</sub> , 600 MHz) of compound 5 .....                                                                 | 24 |
| Figure S33. NOESY NMR spectrum (CDCl <sub>3</sub> , 600 MHz) of compound 5.....                                                                 | 25 |
| <b>1.7 Compound 6</b> .....                                                                                                                     | 26 |
| Figure S35. <sup>1</sup> H NMR spectrum (CDCl <sub>3</sub> , 600 MHz) of compound 6. Compound 6 was isolated as a mixture with compound 5. .... | 26 |
| Figure S36. <sup>13</sup> C NMR spectrum (CDCl <sub>3</sub> , 150 MHz) of compound 6 .....                                                      | 27 |
| Figure S37. COSY NMR spectrum (CDCl <sub>3</sub> , 600 MHz) of compound 6.....                                                                  | 27 |
| Figure S38. HSQC NMR spectrum (CDCl <sub>3</sub> , 600 MHz) of compound 6 .....                                                                 | 28 |
| Figure S39. HMBC NMR spectrum (CDCl <sub>3</sub> , 600 MHz) of compound 6 .....                                                                 | 28 |
| Figure S40. NOESY NMR spectrum (CDCl <sub>3</sub> , 600 MHz) of compound 6.....                                                                 | 29 |
| <b>1.8 Compound 7</b> .....                                                                                                                     | 30 |
| Figure S41. <sup>1</sup> H NMR spectrum (CDCl <sub>3</sub> , 600 MHz) of compound 7 .....                                                       | 30 |
| Figure S42. <sup>13</sup> C NMR spectrum (CDCl <sub>3</sub> , 150 MHz) of compound 7 .....                                                      | 30 |
| Figure S43. COSY NMR spectrum (CDCl <sub>3</sub> , 600 MHz) of compound 7.....                                                                  | 31 |
| Figure S44. HSQC NMR spectrum (CDCl <sub>3</sub> , 600 MHz) of compound 7 .....                                                                 | 31 |
| Figure S45. HMBC NMR spectrum (CDCl <sub>3</sub> , 600 MHz) of compound 7 .....                                                                 | 32 |
| Figure S46. NOESY NMR spectrum (CDCl <sub>3</sub> , 600 MHz) and key NOESY correlations for compound 7 .....                                    | 32 |
| Figure S47. HRGCEIMS spectrum of compound 7 .....                                                                                               | 33 |

---

|                                                                                          |    |
|------------------------------------------------------------------------------------------|----|
| <b>1.9 Compound 8</b> .....                                                              | 34 |
| Table S6. NMR spectroscopic data of compound 8.....                                      | 34 |
| Figure S48. <sup>1</sup> H NMR spectrum (CDCl <sub>3</sub> , 600 MHz) of compound 8..... | 34 |

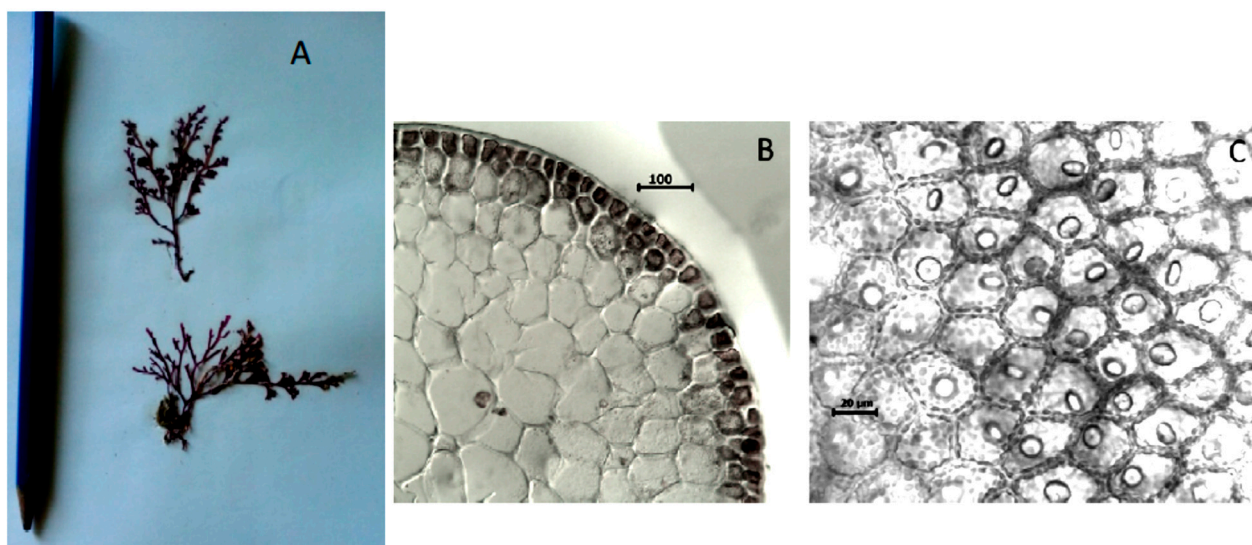

**Figure S1.** Images of *Laurencia corymbosa* (Francis, 2014) (a) habit, (b) cross section through the thallus with the outermost cortical cells and spaces between medullary and cortical cells in view and (c) cortical cells showing one corpus en cerise per cell (40 × magnification).

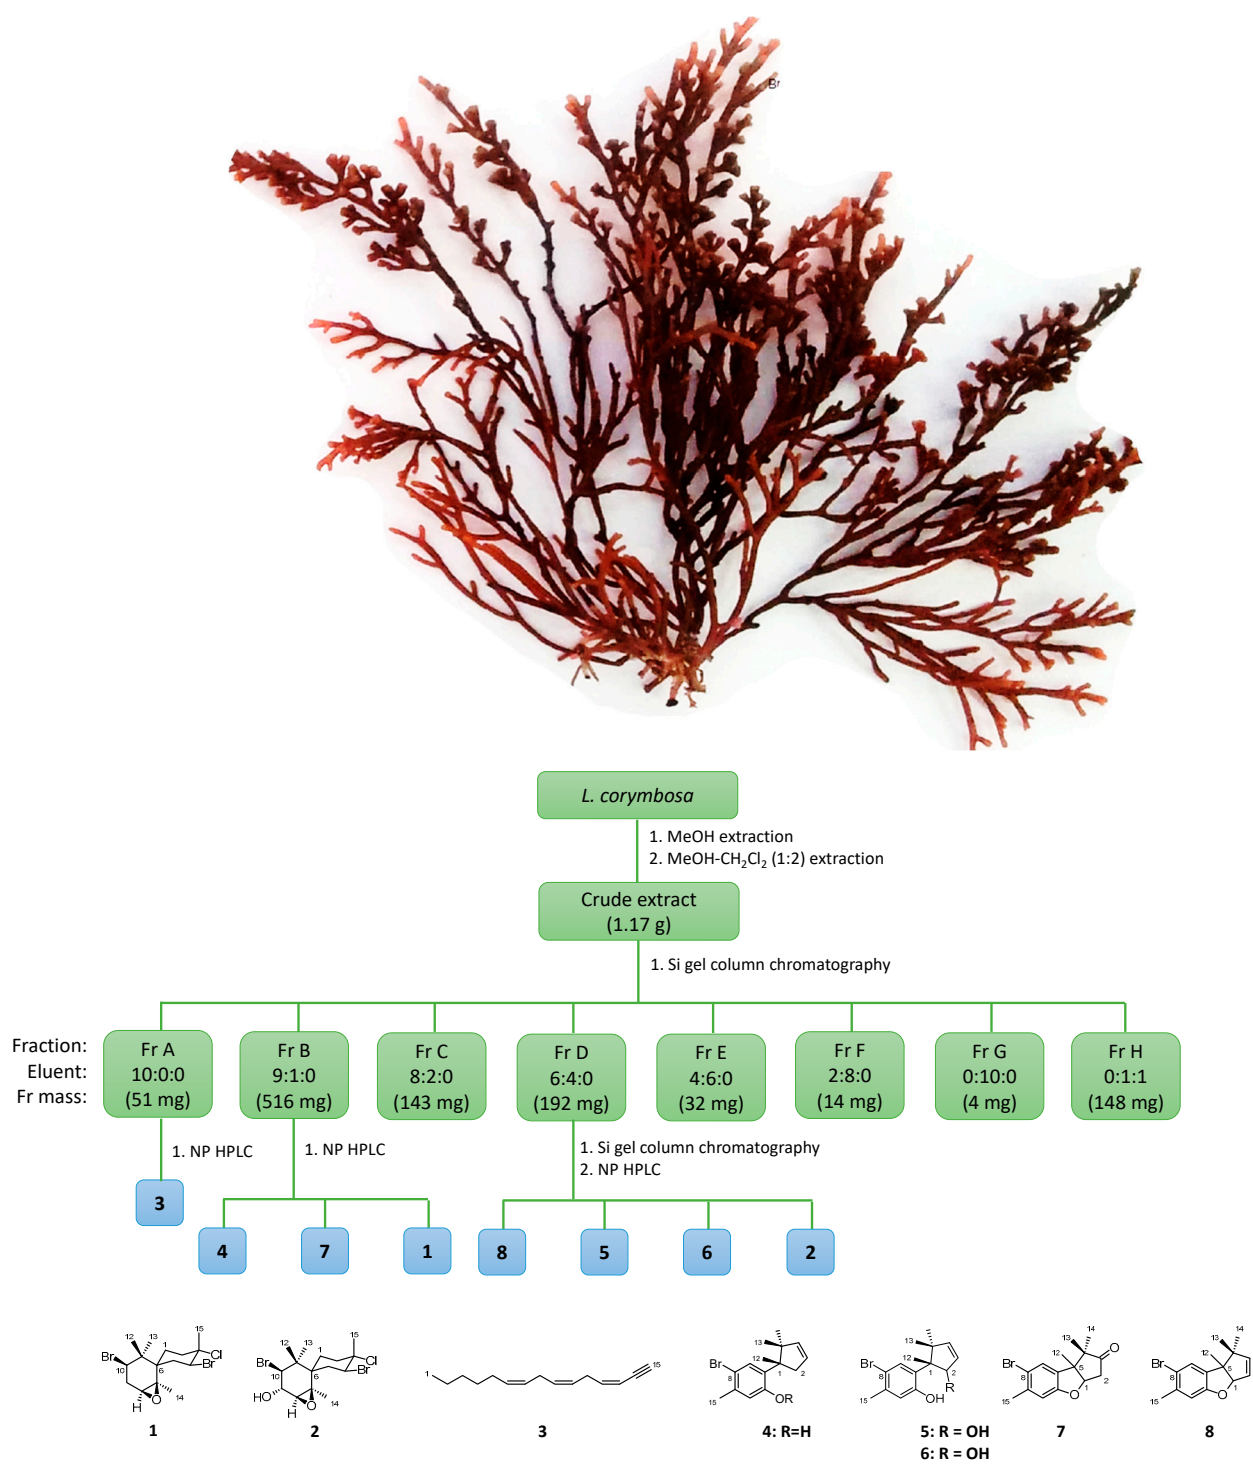

**Scheme S1.** Isolation of compounds 1-8 from *L. corymbosa*.

## Spectroscopic data of compounds isolated

### 1.1. Compound 1

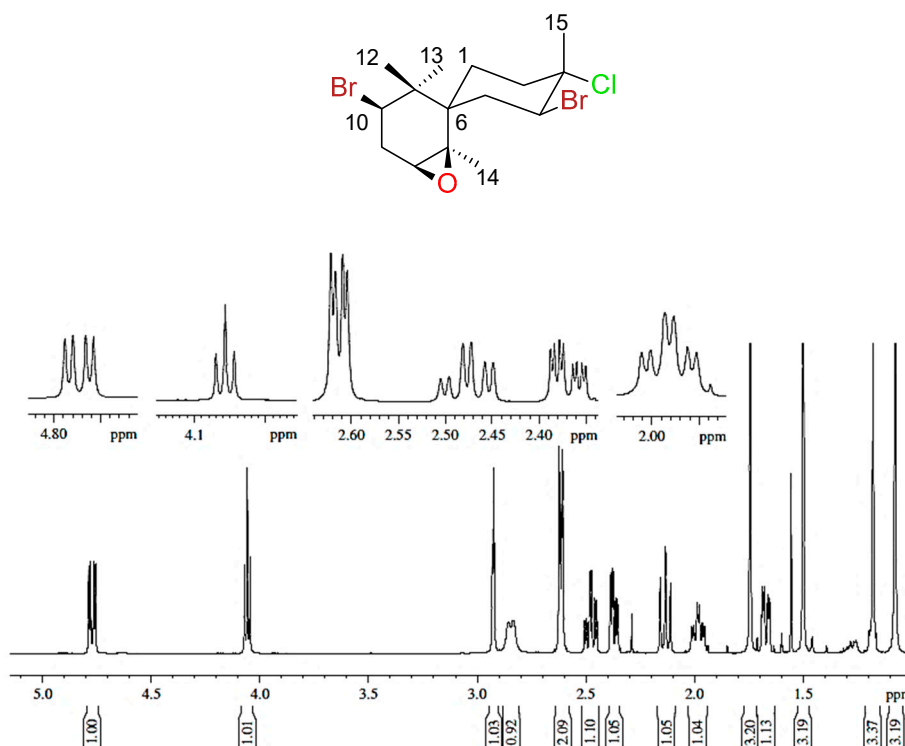

Figure S2. <sup>1</sup>H NMR spectrum (CDCl<sub>3</sub>, 600 MHz) of compound 1.

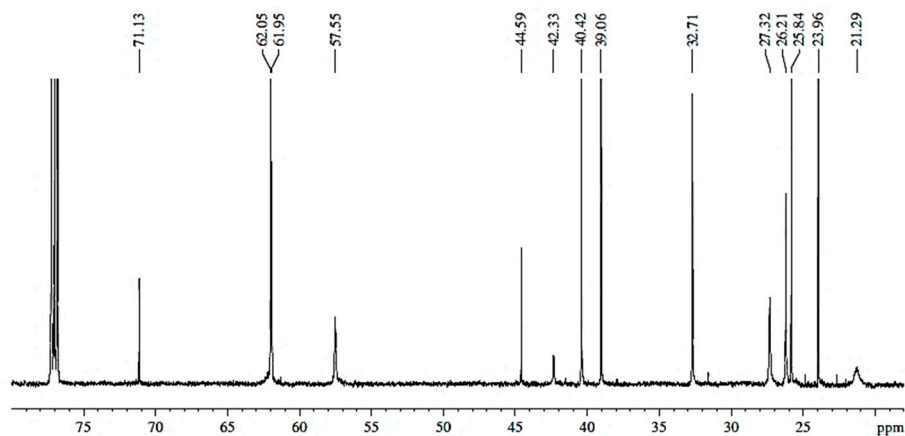

Figure S3. <sup>13</sup>C NMR spectrum (CDCl<sub>3</sub>, 150 MHz) of compound 1.

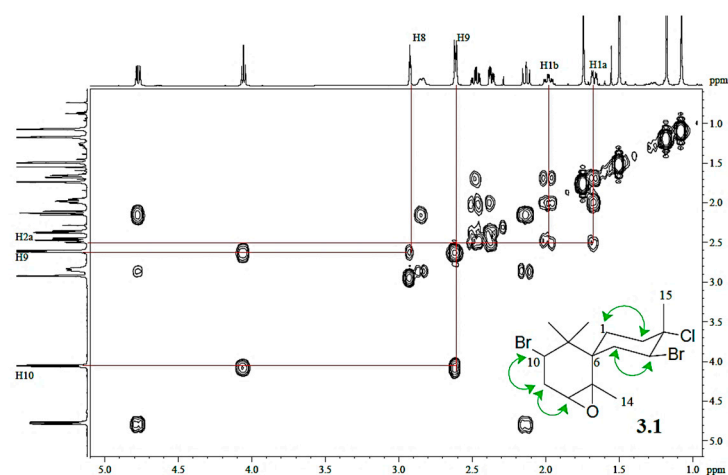

Figure S4.  $^1\text{H}$ - $^1\text{H}$  COSY correlations of compound 1.

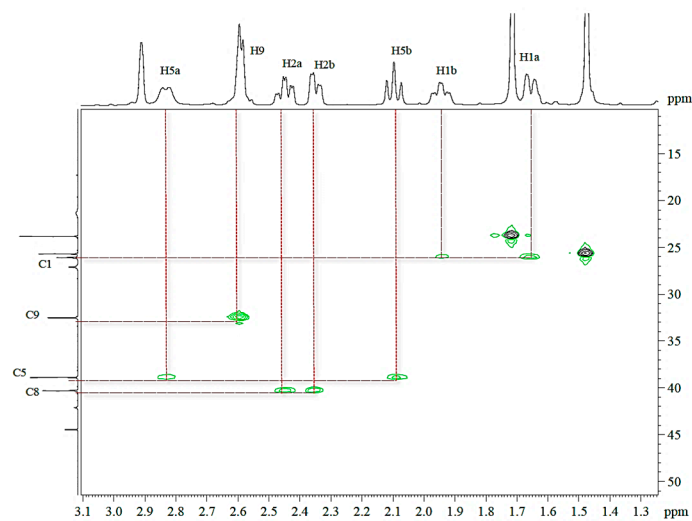

Figure S5. Partial multiplicity-edited HSQC spectrum of compound 1 showing methylene correlations.

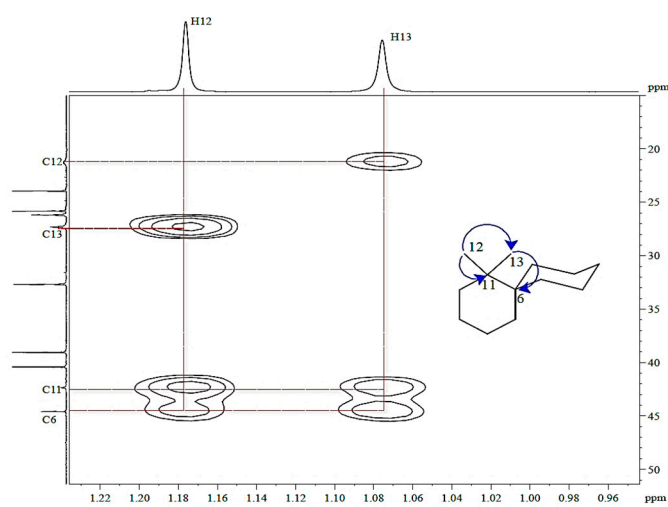

Figure S6. Partial HMBC spectrum of compound 1 showing key correlations.



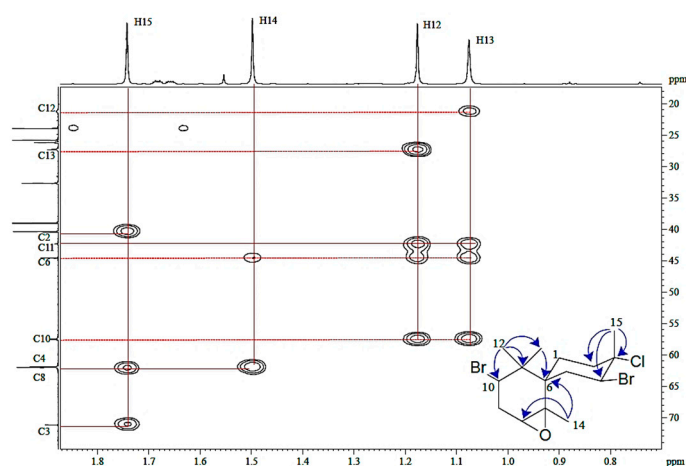

Figure S7. Partial HMBC spectrum of compound 1 showing key correlations.

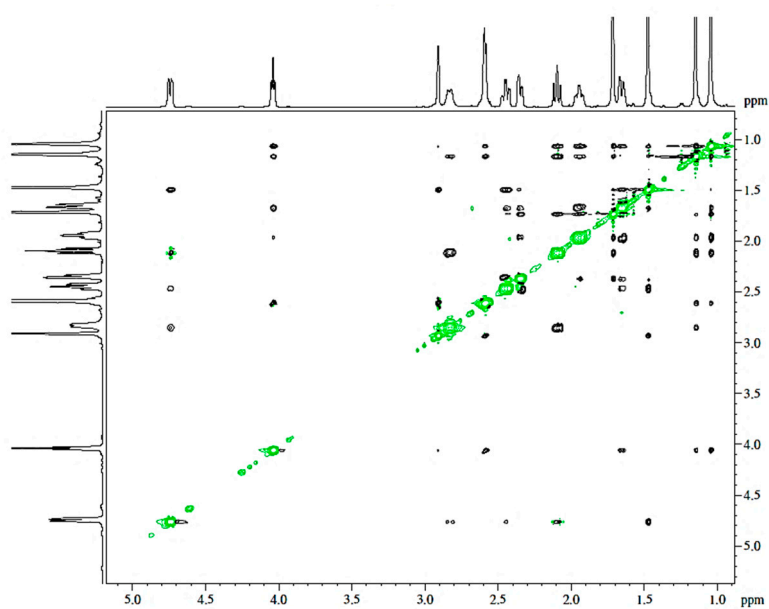

Figure S8. NOESY NMR spectrum (CDCl<sub>3</sub>, 600 MHz) of compound 1.

## 1.2 Compound 1a

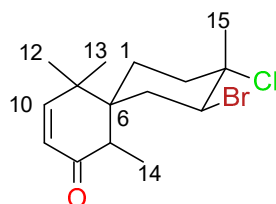

Table S1. NMR spectroscopic data of compound 1a.

| Carbon No | $\delta_c$ | $\delta_c$ mult | $\delta_H$ , mult, J (Hz) | COSY     | HMBC              |
|-----------|------------|-----------------|---------------------------|----------|-------------------|
| 1a        | 28.3       | CH <sub>2</sub> | 1.43, dq, 15.0, 2.9       | H2b      | -                 |
| 1b        |            |                 | 1.71, m                   | H2a      | -                 |
| 2a        | 37.7       | CH <sub>2</sub> | 2.19, td, 14.8, 4.1       | H1b      | -                 |
| 2b        |            |                 | 2.35, dt, 14.8, 4.1       | H1a      | -                 |
| 3         | 71.8       | C               | -                         | -        | -                 |
| 4         | 59.7       | CH              | 4.45, dd, 13.3, 4.5       | H5a, H5b | -                 |
| 5a        | 37.1       | CH <sub>2</sub> | 1.98, t, 13.3             | H4       | -                 |
| 5b        |            |                 | 2.40, td, 13.3, 4.5       | H4       | -                 |
| 6         | 43.1       | C               | -                         | -        | -                 |
| 7         | 44.1       | CH              | 2.90, q, 7.8              | H14      | C6, C8, C11, C14  |
| 8         | 201.5      | C               | -                         | -        | -                 |
| 9         | 123.8      | CH              | 5.82, d, 10.2             | H10      | -                 |
| 10        | 156.0      | CH              | 6.43, d, 10.2             | H9       | C8                |
| 11        | 39.1       | C               | -                         | -        | -                 |
| 12        | 25.4       | CH <sub>3</sub> | 1.09, s                   | -        | C6, C10, C11, C13 |
| 13        | 25.2       | CH <sub>3</sub> | 1.21, s                   | -        | C6, C10, C11, C12 |
| 14        | 15.4       | CH <sub>3</sub> | 1.30, d, 8.1              | H7       | C7, C8            |
| 15        | 23.7       | CH <sub>3</sub> | 1.70, s                   | -        | C2, C3, C4        |

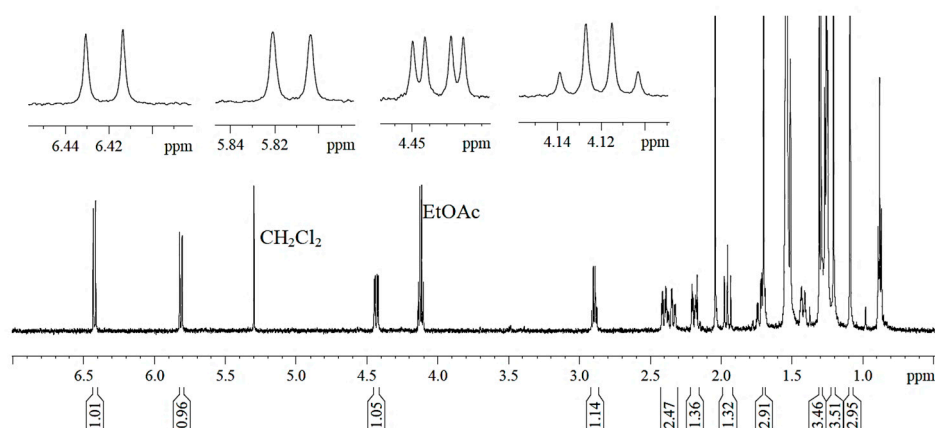Figure S9. <sup>1</sup>H NMR spectrum (CDCl<sub>3</sub>, 600 MHz) of compound 1a.

## 1.3 Compound 1b

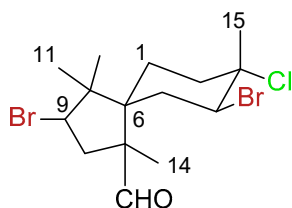

Table S2. NMR spectroscopic data of compound 1b.

| Carbon No | $\delta_c$ | $\delta_c$ mult | $\delta_H$ , mult, $J$ (Hz) | COSY     | HMBC            |
|-----------|------------|-----------------|-----------------------------|----------|-----------------|
| 1         | 27.3       | CH              | 1.70, m                     | H2a, H2b | -               |
| 2a        | 40.5       | CH <sub>2</sub> | 2.32, td, 14.1, 4.0         | H1       | -               |
| 2b        |            |                 | 2.42, dt, 14.1, 4.0         | H1       | -               |
| 3         | 71.0       | C               | -                           | -        | -               |
| 4         | 60.5       | CH              | 4.56, dd, 13.4, 3.6         | H5a, H5b | -               |
| 5a        | 39.4       | CH <sub>2</sub> | 1.92, t, 14.6               | H4       | -               |
| 5b        |            |                 | 2.26, td, 14.6, 3.1         | -        | -               |
| 6         | 56.0       | C               | -                           | -        | -               |
| 7         | 52.0       | C               | -                           | -        | -               |
| 8a        | 43.4       | CH <sub>2</sub> | 1.97, dd, 14.1, 8.4         | H9       | C7, C14         |
| 8b        |            |                 | 2.88, dd, 14.1, 8.4         | H8a, H9  | C9, C13         |
| 9         | 58.4       | CH              | 4.15, dd, 11.3, 8.4         | H8a, H8b | C11             |
| 10        | 51.2       | C               | -                           | -        | -               |
| 11        | 20.4       | CH <sub>3</sub> | 0.88, s                     | -        | C6, C9, C12     |
| 12        | 22.6       | CH <sub>3</sub> | 0.98, s                     | -        | C6, C9, C11     |
| 13        | 203.5      | CHO             | 9.79, s                     | -        | C6, C8, C14     |
| 14        | 23.2       | CH <sub>3</sub> | 1.38, s                     | -        | C6, C7, C8, C13 |
| 15        | 23.7       | CH <sub>3</sub> | 1.71, s                     | -        | C2, C3, C4      |

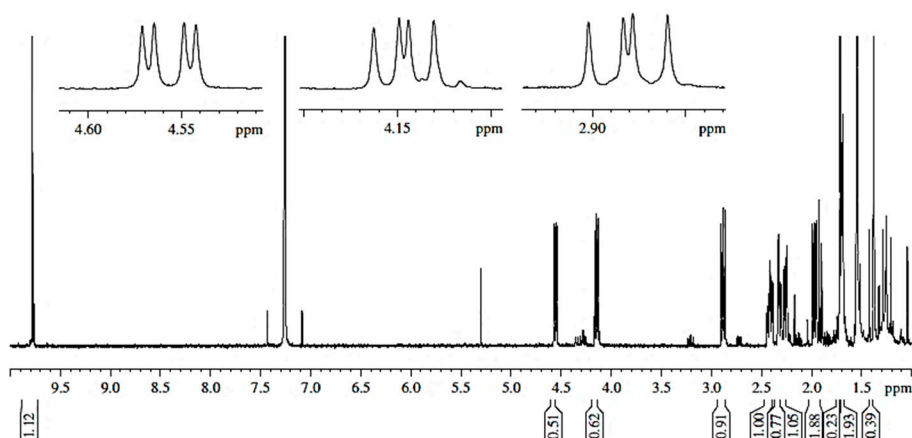Figure S10. <sup>1</sup>H NMR spectrum (CDCl<sub>3</sub>, 600 MHz) of compound 1b.

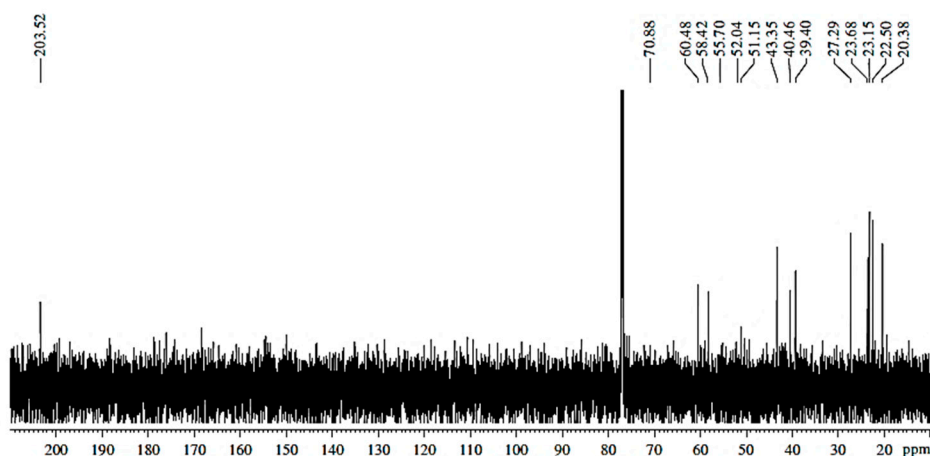

**Figure S11.**  $^{13}\text{C}$  NMR spectrum ( $\text{CDCl}_3$ , 150 MHz) of compound **1b**.

#### 1.4 Compound 2

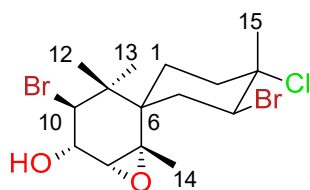

**Table S3.** NMR spectroscopic data of compound **2**.

| Carbon No | $\delta_{\text{C}}$ | $\delta_{\text{C}}$ mult | $\delta_{\text{H}}$ , mult, J (Hz) |
|-----------|---------------------|--------------------------|------------------------------------|
| 1         | 25.4                | $\text{CH}_2$            | 2.06, dt, 14.6, 5.9                |
| 2a        | 40.0                | $\text{CH}_2$            | 2.37, ddd, 14.6, 5.9, 2.1          |
| 2b        |                     |                          | 2.46, dd, 14.6, 5.9                |
| 3         | 70.5                | C                        | -                                  |
| 4         | 61.9                | CH                       | 4.81, dd, 13.3, 5.4                |
| 5a        |                     |                          | 2.18, m                            |
| 5b        | 38.8                | $\text{CH}_2$            | 2.53, m                            |
| 6         | 44.5                | C                        | -                                  |
| 7         | 64.8                | C                        | -                                  |
| 8         | 65.2                | CH                       | 3.04, s                            |
| 9         | 70.7                | CH                       | 4.23, dd, 9.1, 2.8                 |
| 10        | 69.9                | CH                       | 3.96, d, 9.1                       |
| 11        | 42.9                | C                        | -                                  |
| 12        | 28.5                | $\text{CH}_3$            | 1.16, s                            |
| 13        | 20.0                | $\text{CH}_3$            | 1.16, s                            |
| 14        | 25.5                | $\text{CH}_3$            | 1.52, s                            |
| 15        | 24.0                | $\text{CH}_3$            | 1.74, s                            |

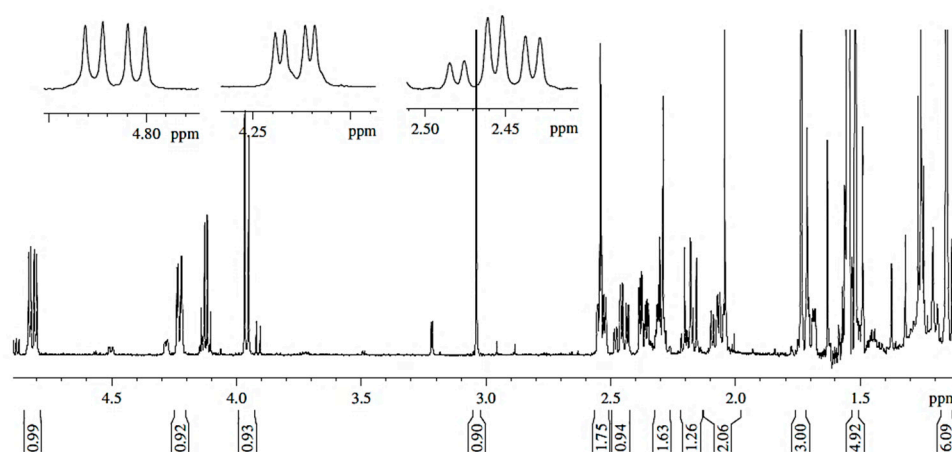

Figure S12. <sup>1</sup>H NMR spectrum (CDCl<sub>3</sub>, 600 MHz) of compound 2.

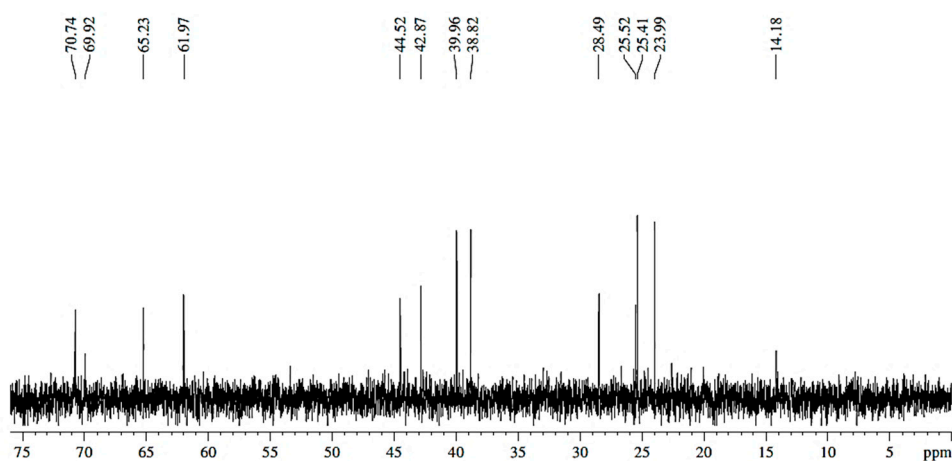

Figure S13. <sup>13</sup>C NMR spectrum (CDCl<sub>3</sub>, 600 MHz) of compound 2.

## 1.5 Compound 3

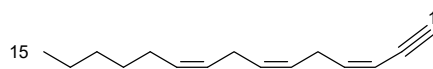**Table S4.** NMR spectroscopic data of compound 3.

| Carbon No | $\delta_{\text{C}}^{\#}$ | $\delta_{\text{C}}$ mult | $\delta_{\text{H}}$ , mult, $J$ (Hz) |
|-----------|--------------------------|--------------------------|--------------------------------------|
| 1         | 81.8                     | CH                       | 3.11, m                              |
| 2         | 80.2                     | C                        | -                                    |
| 3         | 108.3                    | CH                       | 5.48, m                              |
| 4         | 143.7                    | CH                       | 5.96, m                              |
| 5         | 25.7                     | CH <sub>2</sub>          | 2.84, m                              |
| 6         | 125.8                    | CH                       | 5.41, m                              |
| 7         | 127.4                    | CH                       | 5.36, m                              |
| 8         | 27.3                     | CH <sub>2</sub>          | 2.06, m                              |
| 9         | 129.9                    | CH                       | 5.45, m                              |
| 10        | 130.6                    | CH                       | 5.41, m                              |
| 11        | 28.7                     | CH <sub>2</sub>          | 3.11, m                              |
| 12        | 29.3                     | CH <sub>2</sub>          | 1.37, m                              |
| 13        | 31.5                     | CH <sub>2</sub>          | 1.28, m                              |
| 14        | 22.5                     | CH <sub>2</sub>          | 1.31, m                              |
| 15        | 14.1                     | CH <sub>3</sub>          | 0.89, t, 7.1                         |

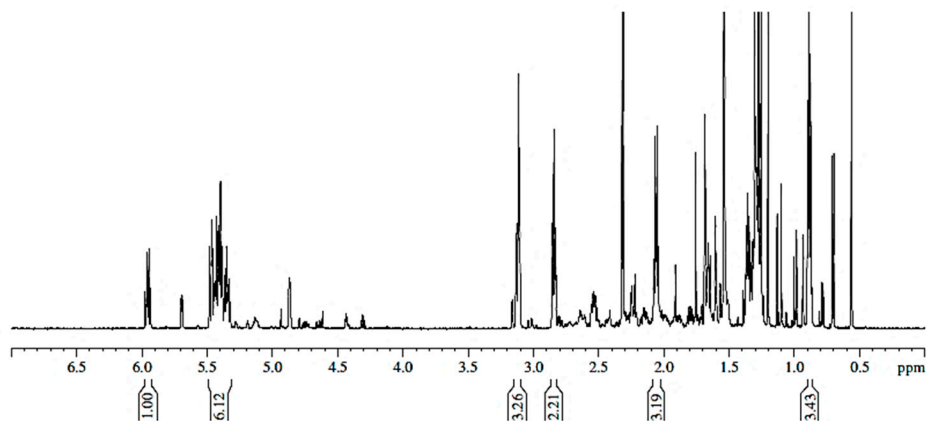**Figure S14.** <sup>1</sup>H NMR spectrum (CDCl<sub>3</sub>, 600 MHz) of compound 3.

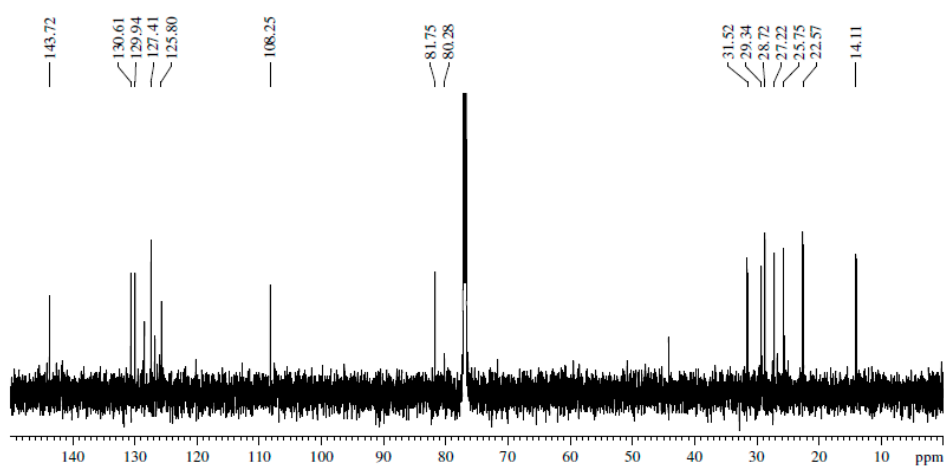

Figure S15. <sup>13</sup>C NMR spectrum (CDCl<sub>3</sub>, 150 MHz) of compound 3.

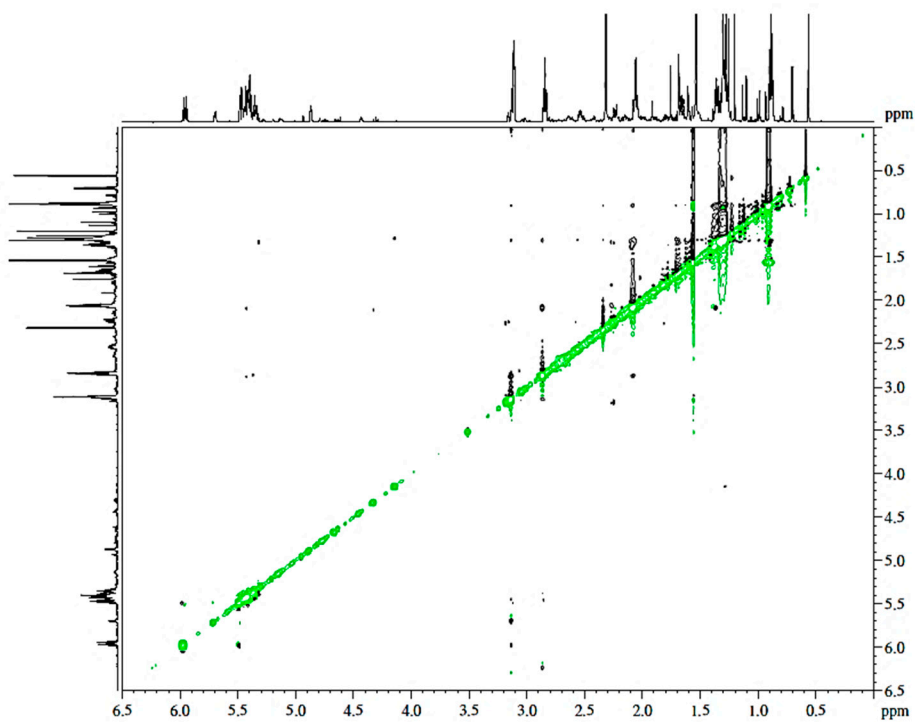

Figure S16. NOESY NMR spectrum (CDCl<sub>3</sub>, 600 MHz) of compound 3.

**1.4 Compound 4**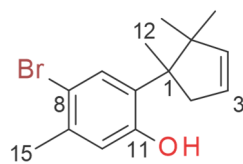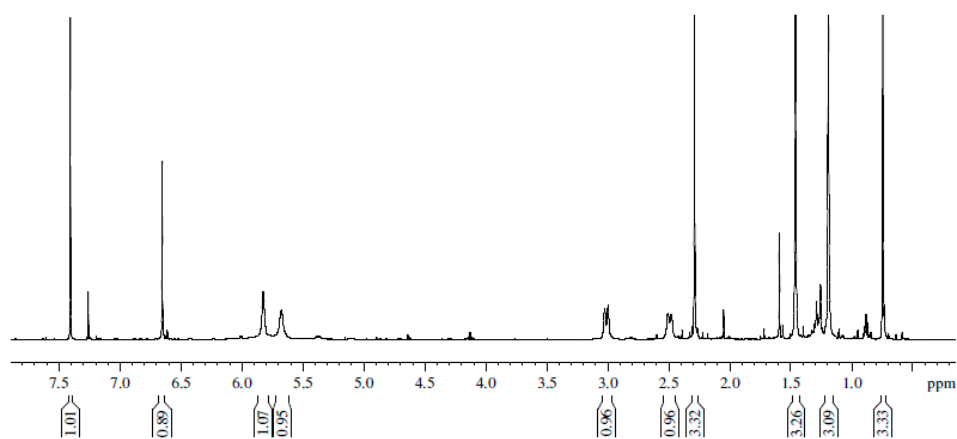**Figure S17.** <sup>1</sup>H NMR spectrum (CDCl<sub>3</sub>, 600 MHz) of compound 4.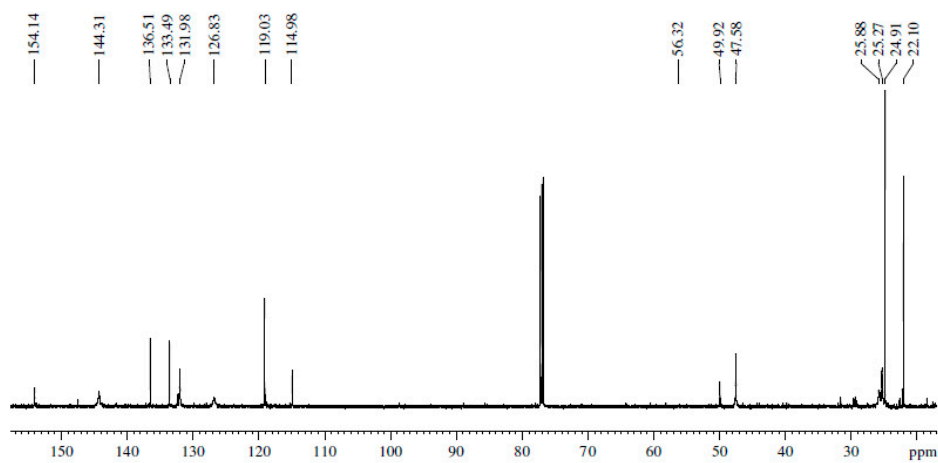**Figure S18.** <sup>13</sup>C NMR spectrum (CDCl<sub>3</sub>, 150 MHz) of compound 4.



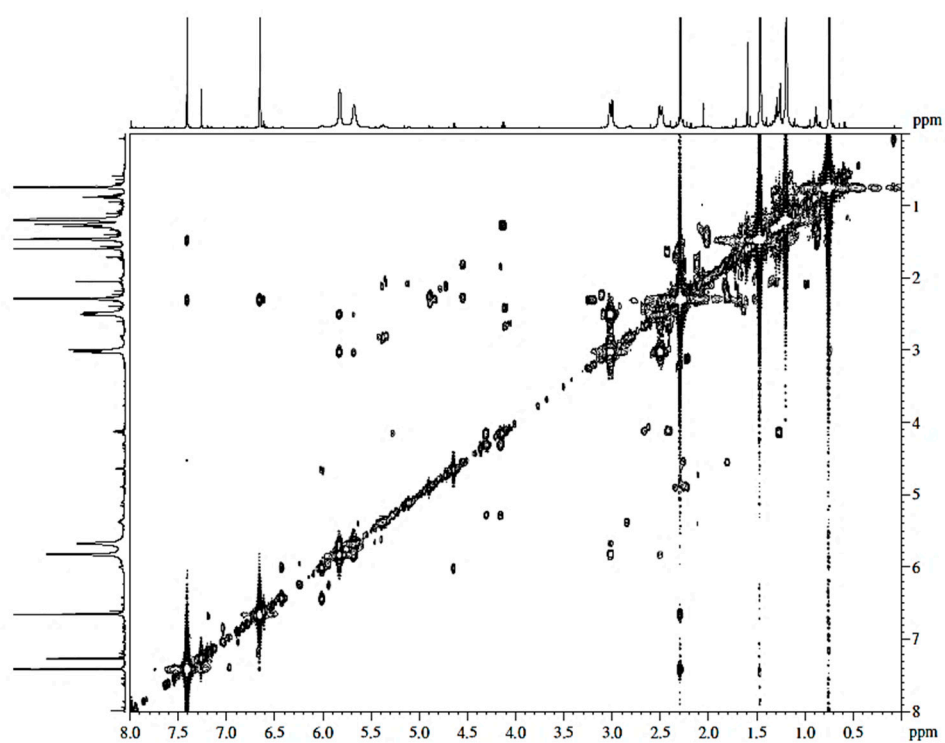

Figure S19. COSY NMR spectrum (CDCl<sub>3</sub>, 600 MHz) of compound 4.

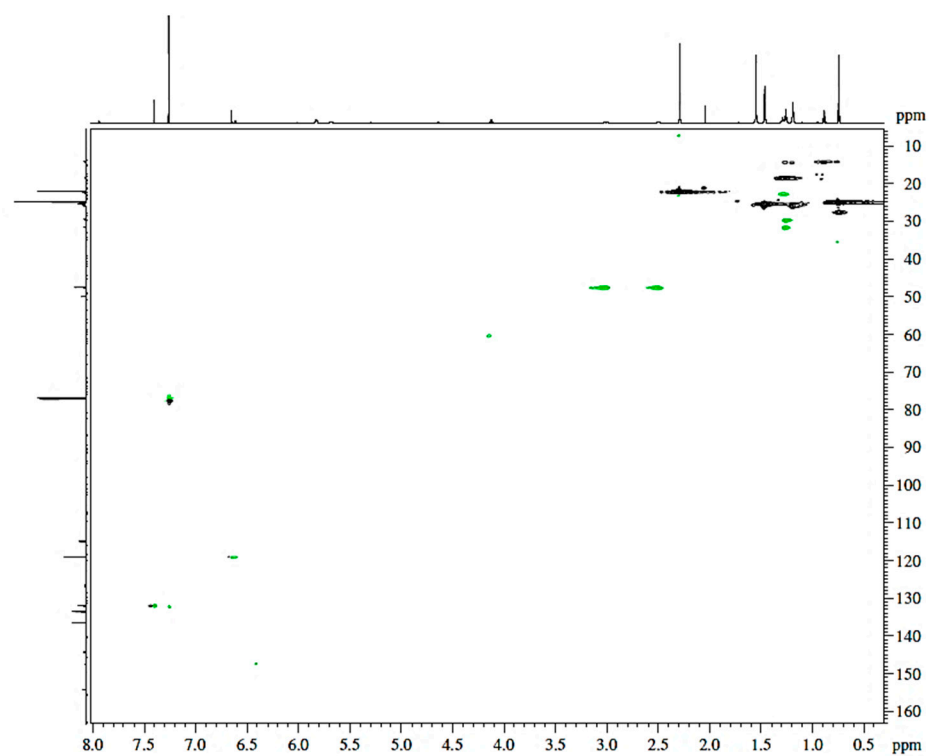

Figure S20. HSQC NMR spectrum (CDCl<sub>3</sub>, 600 MHz) of compound 4.

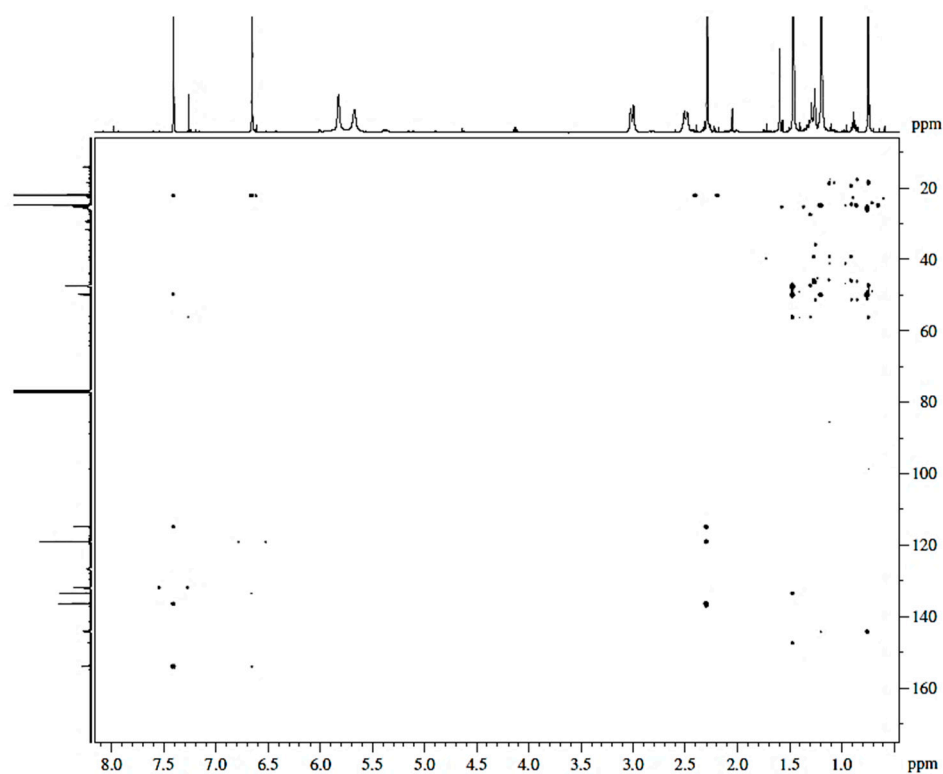

Figure S21. HMBC NMR spectrum (CDCl<sub>3</sub>, 600 MHz) of compound 4.

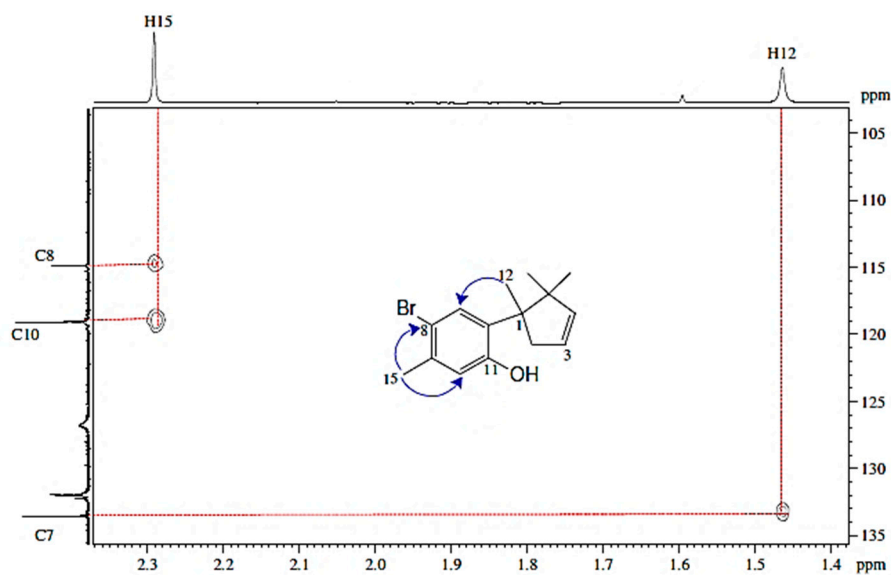

Figure S22. Partial HMBC spectrum of compound 4 showing key correlations.

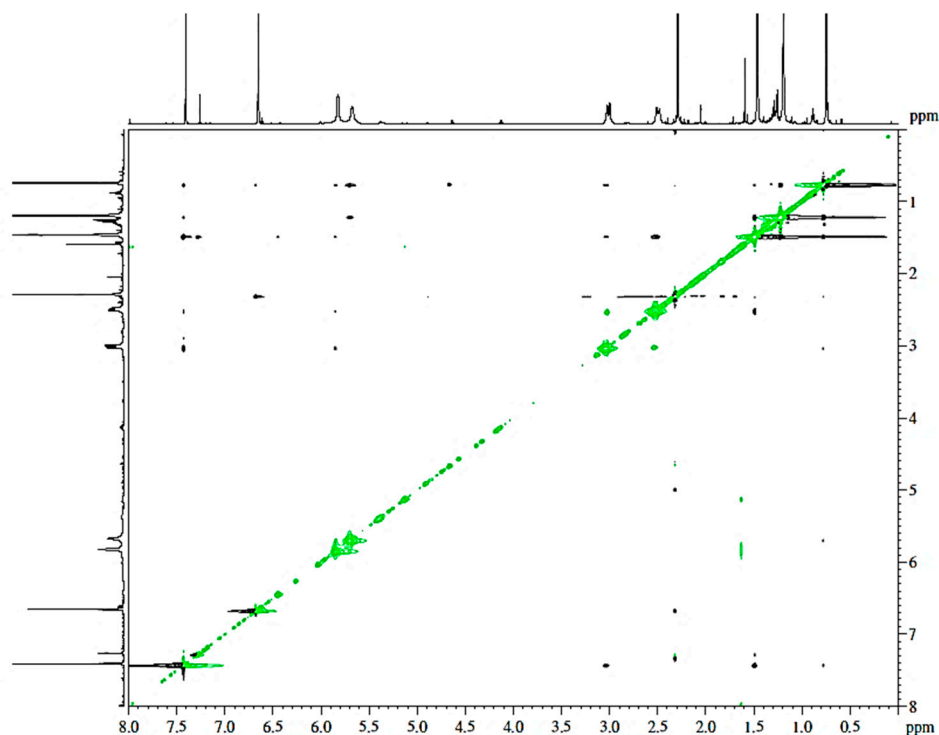

Figure S23. NOESY NMR spectrum ( $\text{CDCl}_3$ , 600 MHz) of compound **4**.

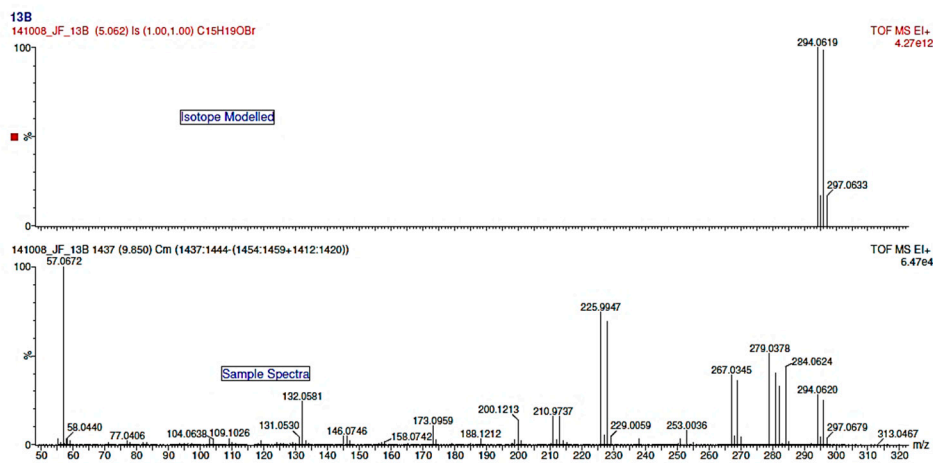

Figure S24. HRGC/MS spectra of compound **4**.

## 1.5 Compound 4a

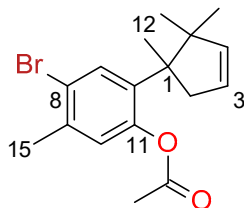

Table S5. NMR spectroscopic data of compound 4a.

| Carbon No | $\delta_c$ | $\delta_c$ mult    | $\delta_H$ , mult, J (Hz) | COSY         | HMBC                 |
|-----------|------------|--------------------|---------------------------|--------------|----------------------|
| 1         | 51.5       | C                  | -                         | -            | -                    |
| 2a        | 45.7       | CH <sub>2</sub>    | 3.19, d, 16.1             | H2b          | C1, C3, C4, C6, C12  |
| 2b        |            |                    | 2.30, m                   | H2a          | -                    |
| 3         | 125.3      | CH                 | 5.63, m                   | H2a, H2b, H4 | C2, C4, C5           |
| 4         | 141.7      | CH                 | 5.39, dd, 5.9, 2.0        | H2a, H2b, H3 | C2, C3, C5           |
| 5         | 50.1       | C                  | -                         | -            | -                    |
| 6         | 138.0      | C                  | -                         | -            | -                    |
| 7         | 133.4      | CH                 | 7.63, s                   | -            | C1, C8, C9, C11, C15 |
| 8         | 121.4      | C                  | -                         | -            | -                    |
| 9         | 136.5      | C                  | -                         | -            | -                    |
| 10        | 126.1      | CH                 | 6.84, s                   | H15          | C6, C8, C11, C15     |
| 11        | 148.0      | C                  | -                         | -            | -                    |
| 12        | 25.4       | CH <sub>3</sub>    | 1.28, s                   | -            | C2, C5, C6           |
| 13        | 23.6       | CH <sub>3</sub>    | 1.29, s                   | -            | C4, C5, C14          |
| 14        | 25.0       | CH <sub>3</sub>    | 0.75, s                   | -            | C4, C5, C13          |
| 15        | 21.8       | CH <sub>3</sub>    | 2.33, s                   | H10          | C8, C9, C10          |
| 16        | 169.6      | OCOCH <sub>3</sub> | -                         | -            | -                    |
| 17        | 21.8       | OCOCH <sub>3</sub> | -                         | -            | C16                  |

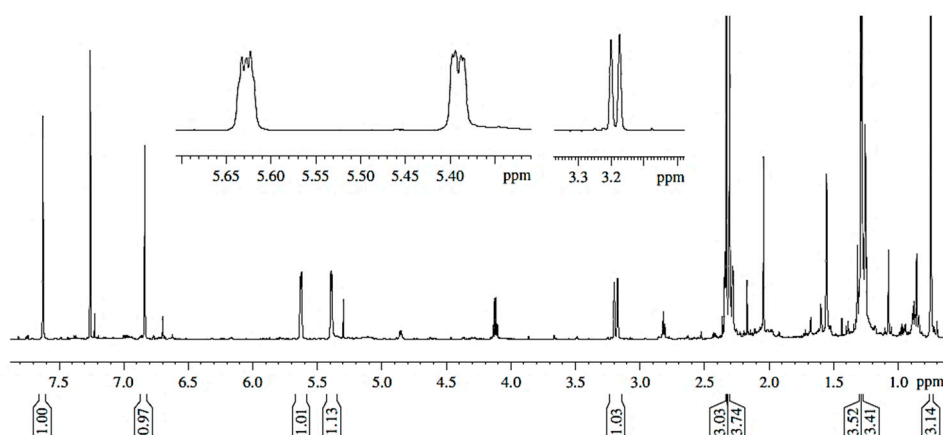Figure S25. <sup>1</sup>H NMR spectrum (CDCl<sub>3</sub>, 600 MHz) of compound 4a.

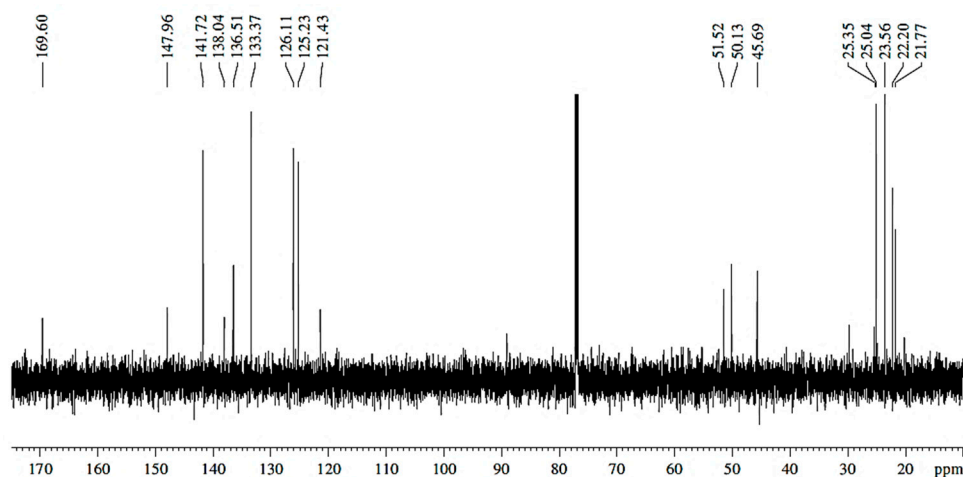

Figure S26.  $^{13}\text{C}$  NMR spectrum ( $\text{CDCl}_3$ , 150 MHz) of compound 4a.

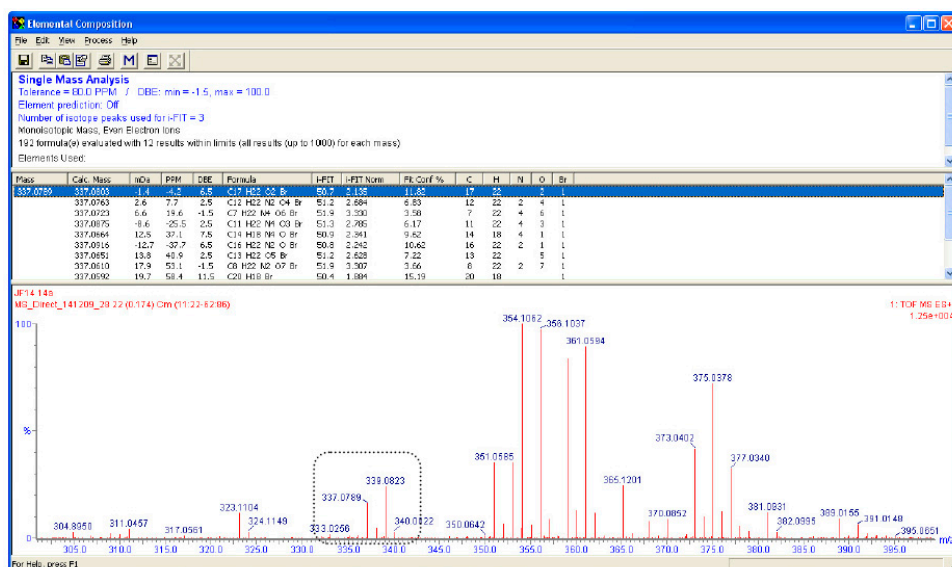

Figure S27. Expansion of the HRGC/MS spectrum of compound 4a.

## 1.6 Compound 5

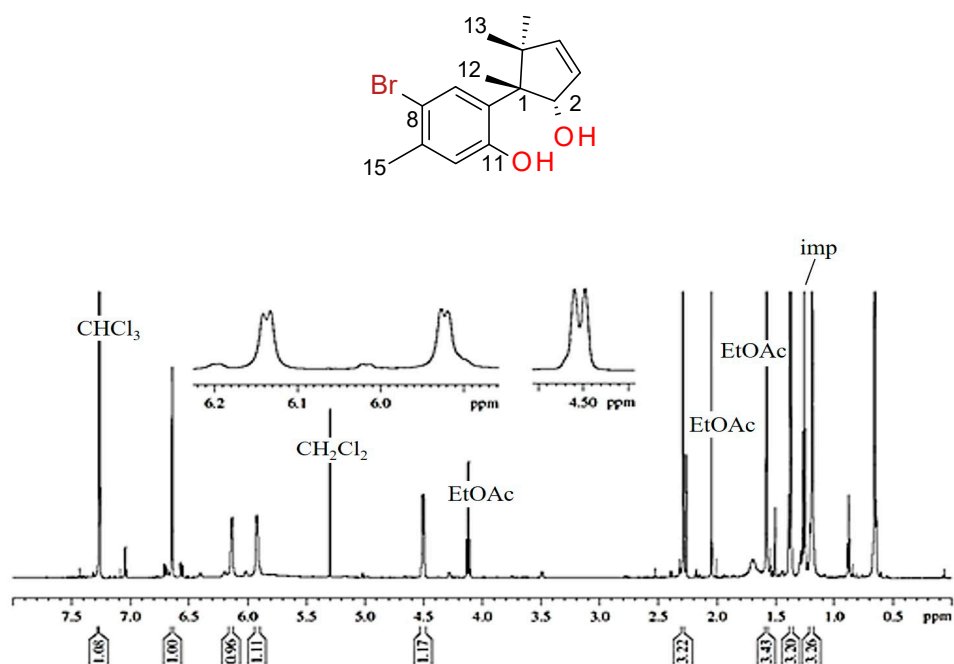Figure S28. <sup>1</sup>H NMR spectrum (CDCl<sub>3</sub>, 600 MHz) of compound 5.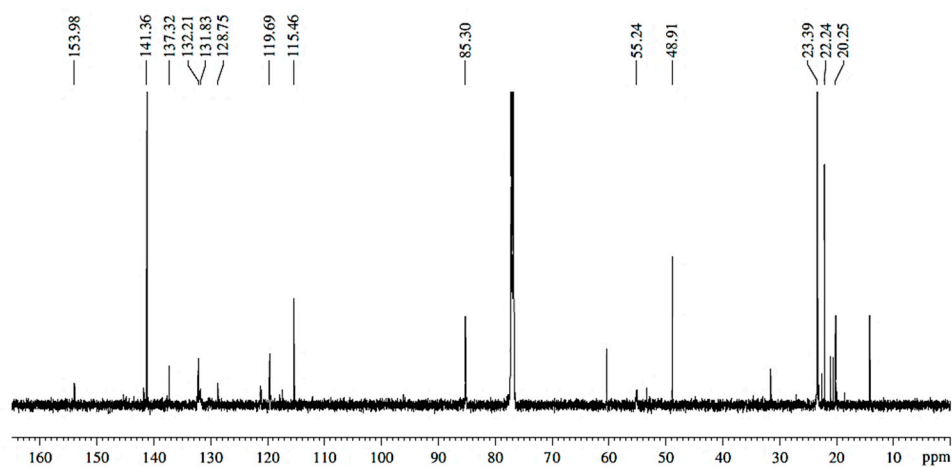Figure S29. <sup>13</sup>C NMR spectrum (CDCl<sub>3</sub>, 150 MHz) of compound 5.

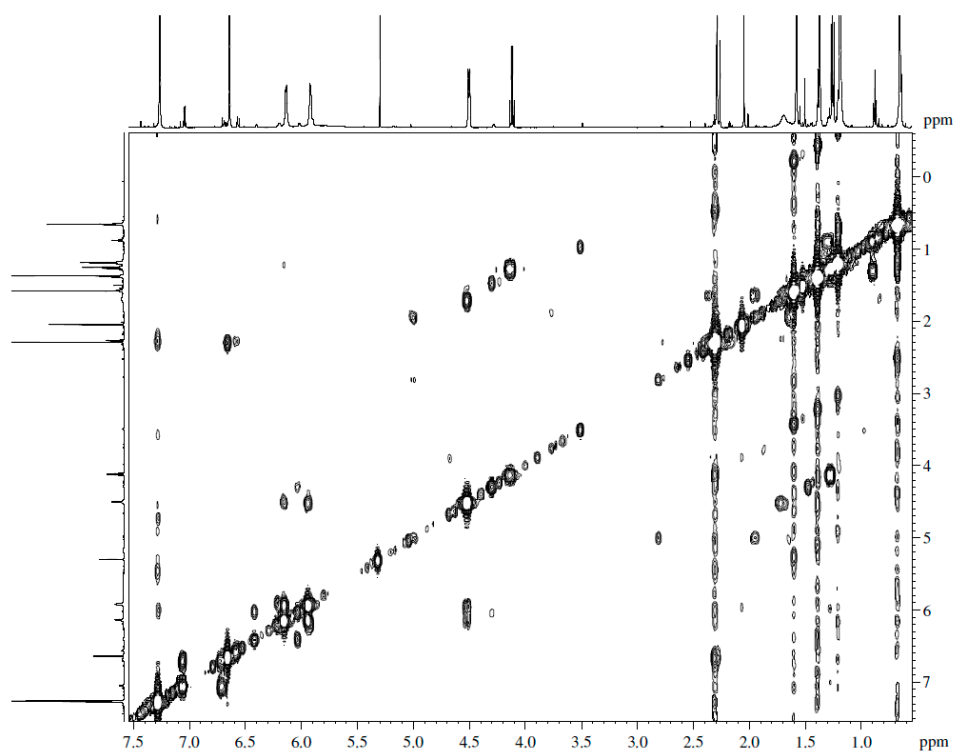

Figure S30. COSY NMR spectrum (CDCl<sub>3</sub>, 600 MHz) of compound 5.

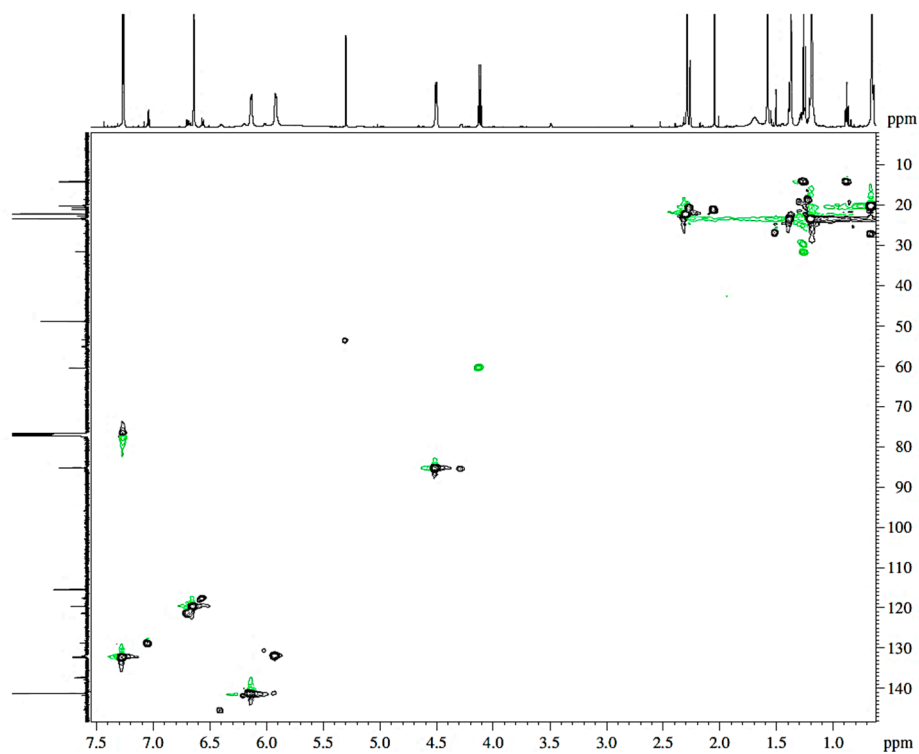

Figure S31. HSQC NMR spectrum (CDCl<sub>3</sub>, 600 MHz) of compound 5.

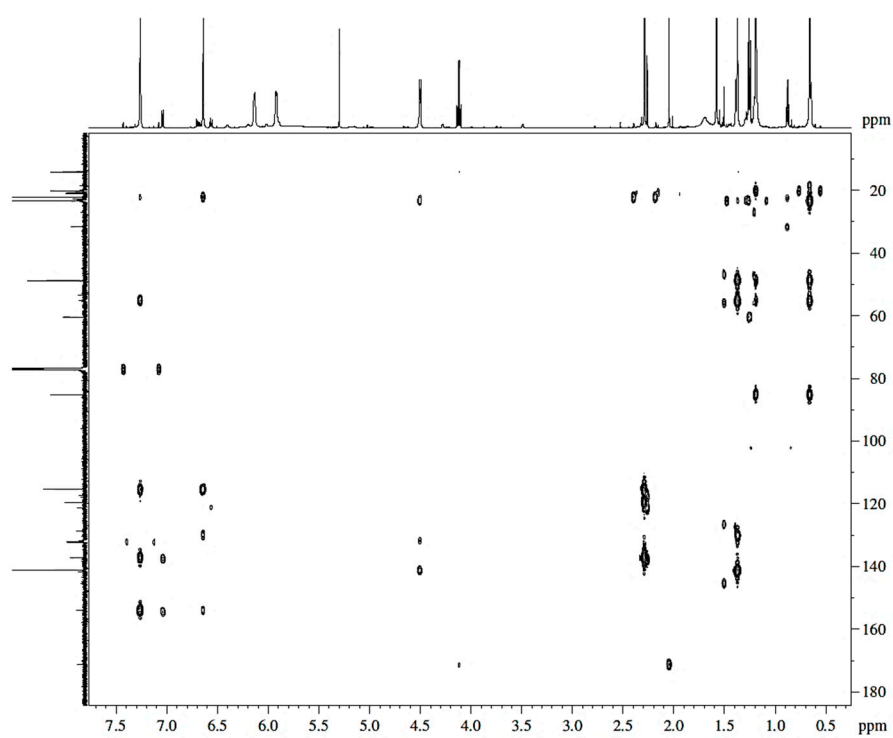

**Figure S32.** HMBC NMR spectrum ( $\text{CDCl}_3$ , 600 MHz) of compound **5**.



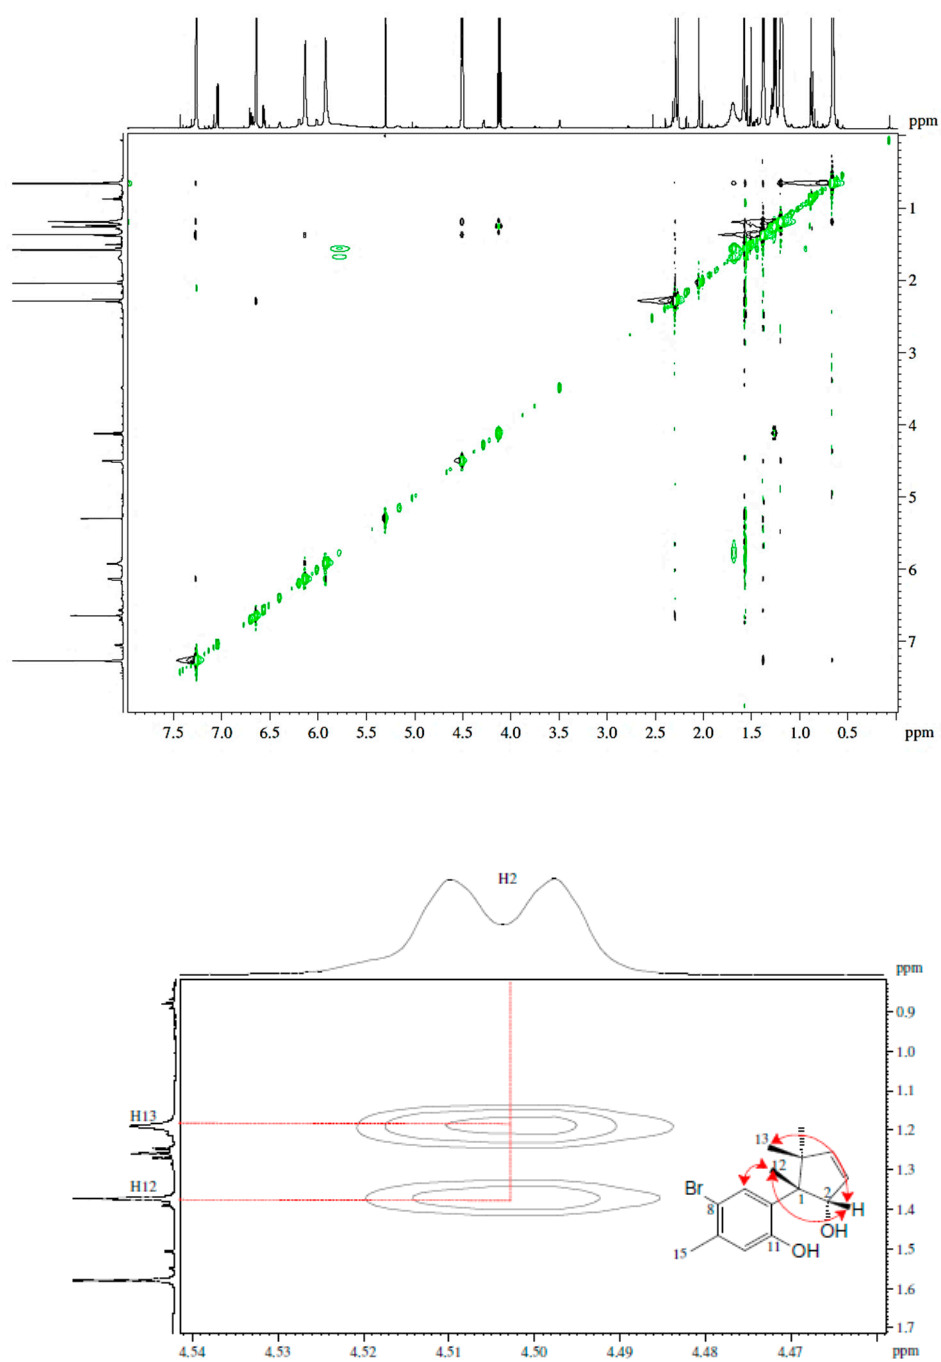

Figure S33. NOESY NMR spectrum ( $\text{CDCl}_3$ , 600 MHz) of compound 5.

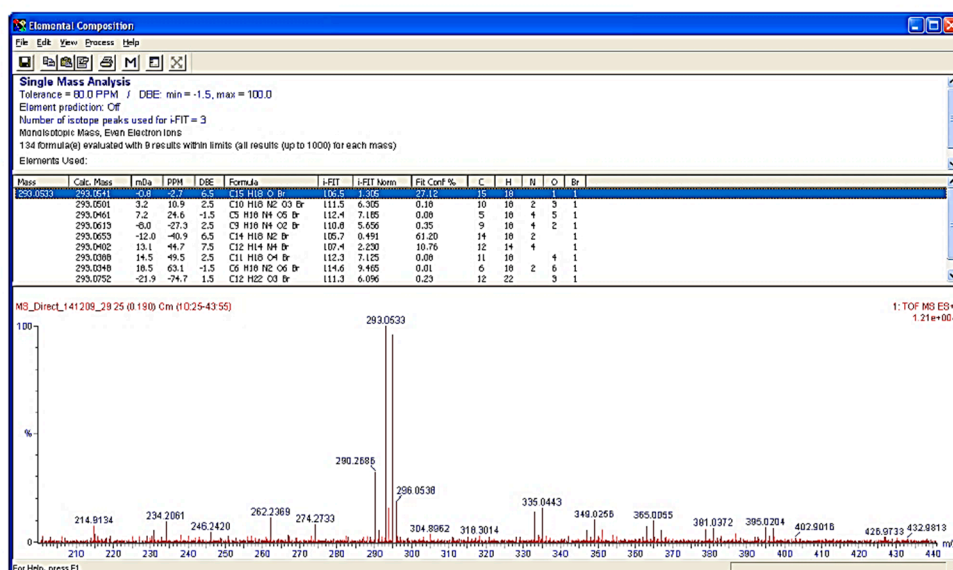

Figure S34. HRGCEIMS spectrum of compound 5.

## 1.7 Compound 6

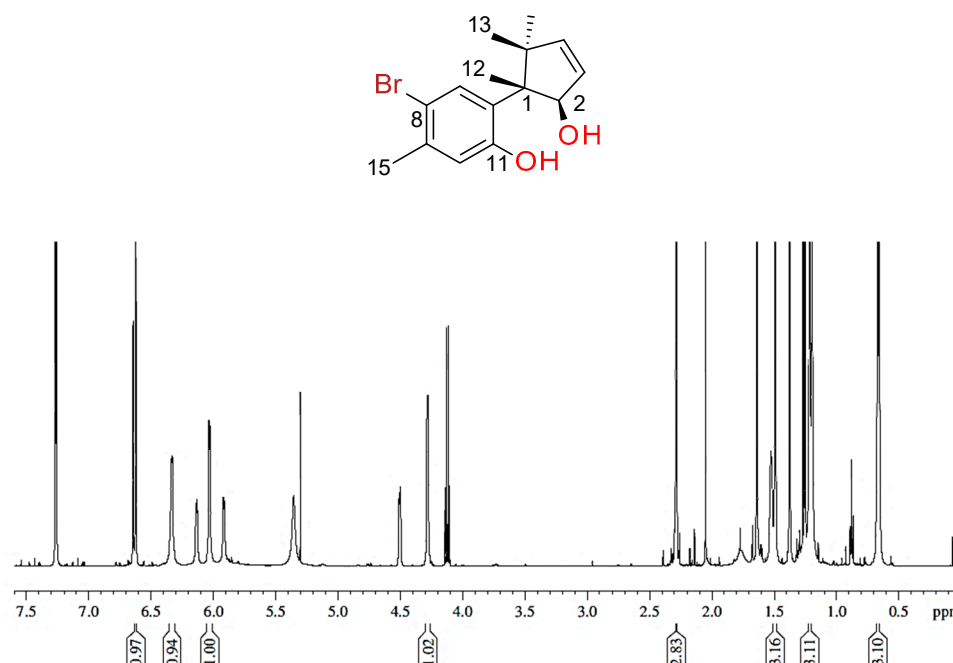Figure S35. <sup>1</sup>H NMR spectrum (CDCl<sub>3</sub>, 600 MHz) of compound 6. Compound 6 was isolated as a mixture with compound 5.

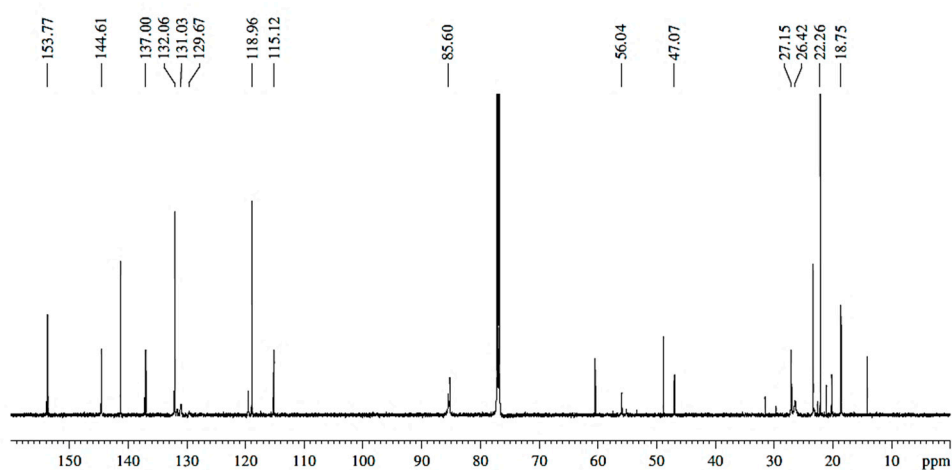

Figure S36.  $^{13}\text{C}$  NMR spectrum ( $\text{CDCl}_3$ , 150 MHz) of compound 6.

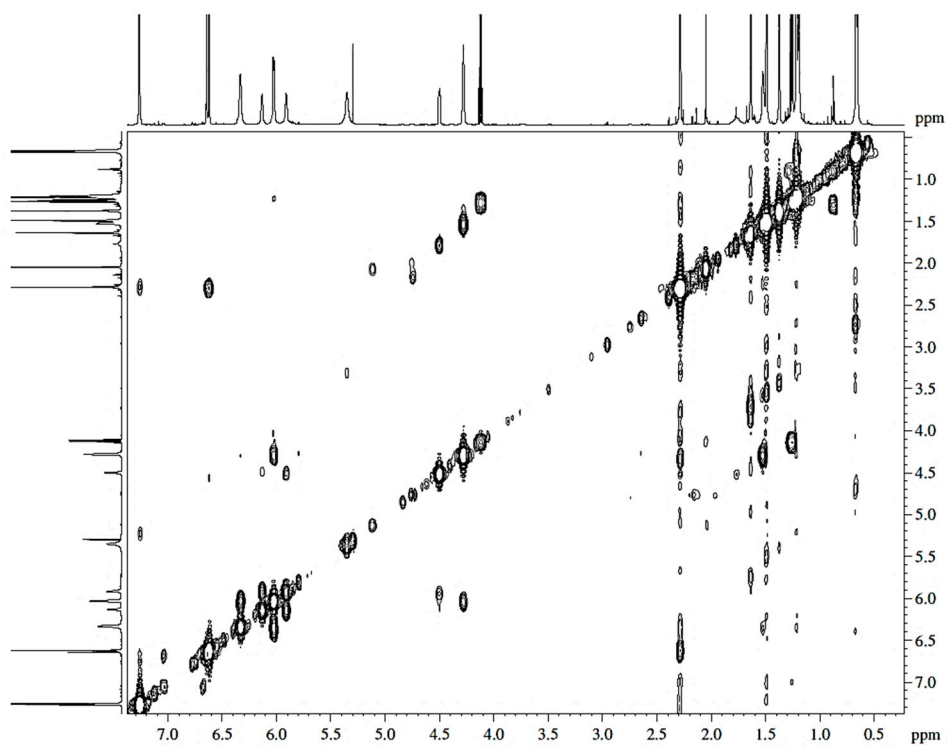

Figure S37. COSY NMR spectrum ( $\text{CDCl}_3$ , 600 MHz) of compound 6.

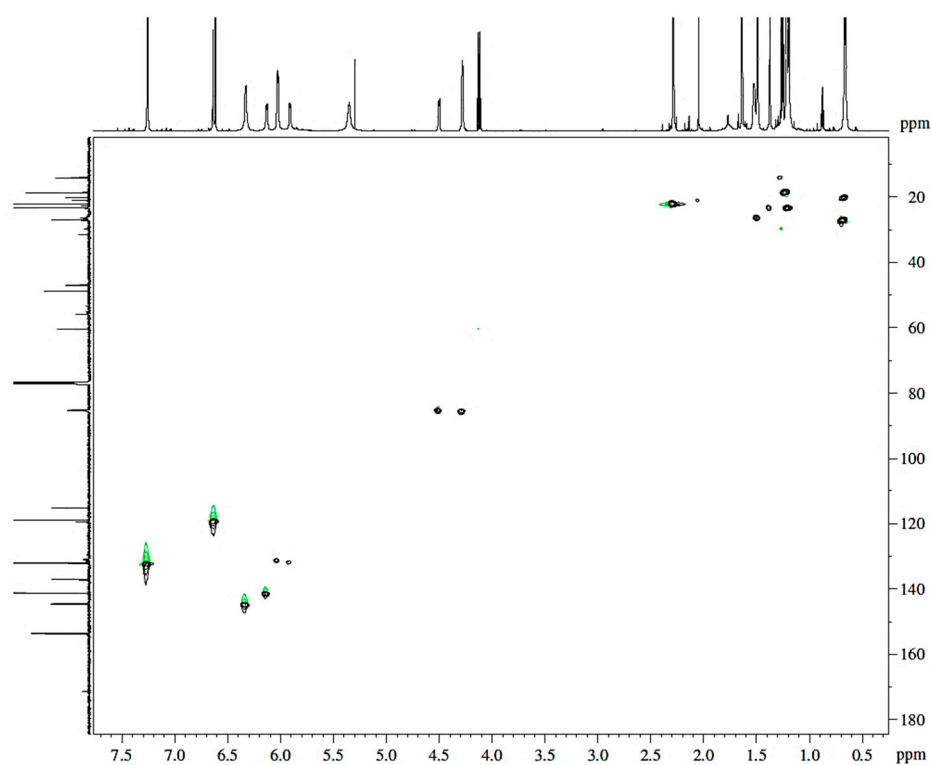

Figure S38. HSQC NMR spectrum (CDCl<sub>3</sub>, 600 MHz) of compound 6.

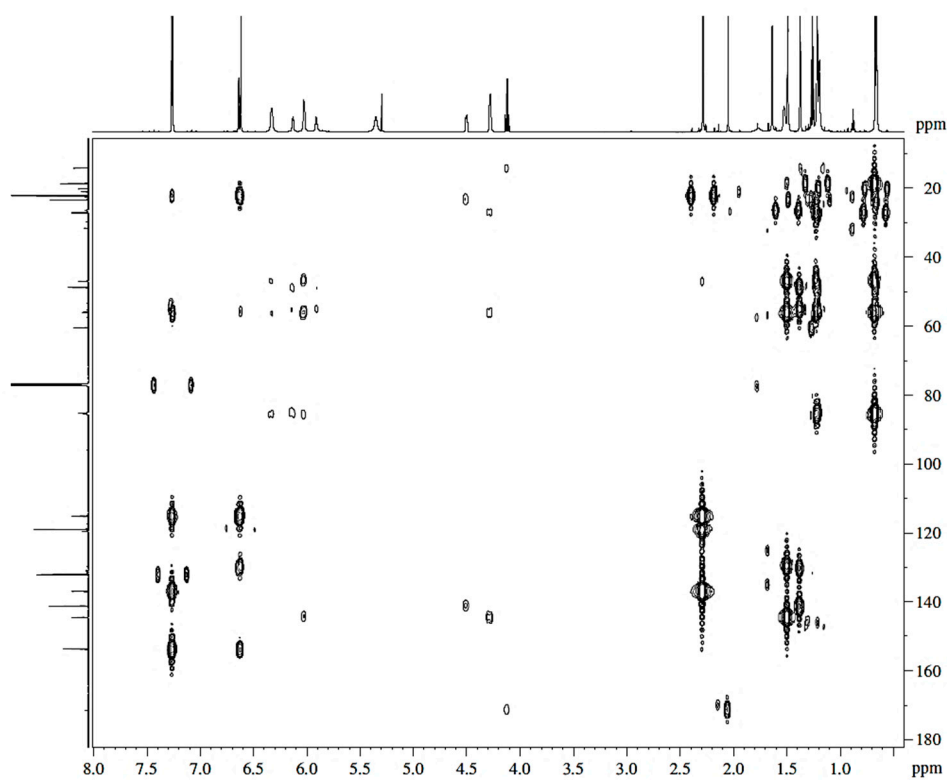

Figure S39. HMBC NMR spectrum (CDCl<sub>3</sub>, 600 MHz) of compound 6.

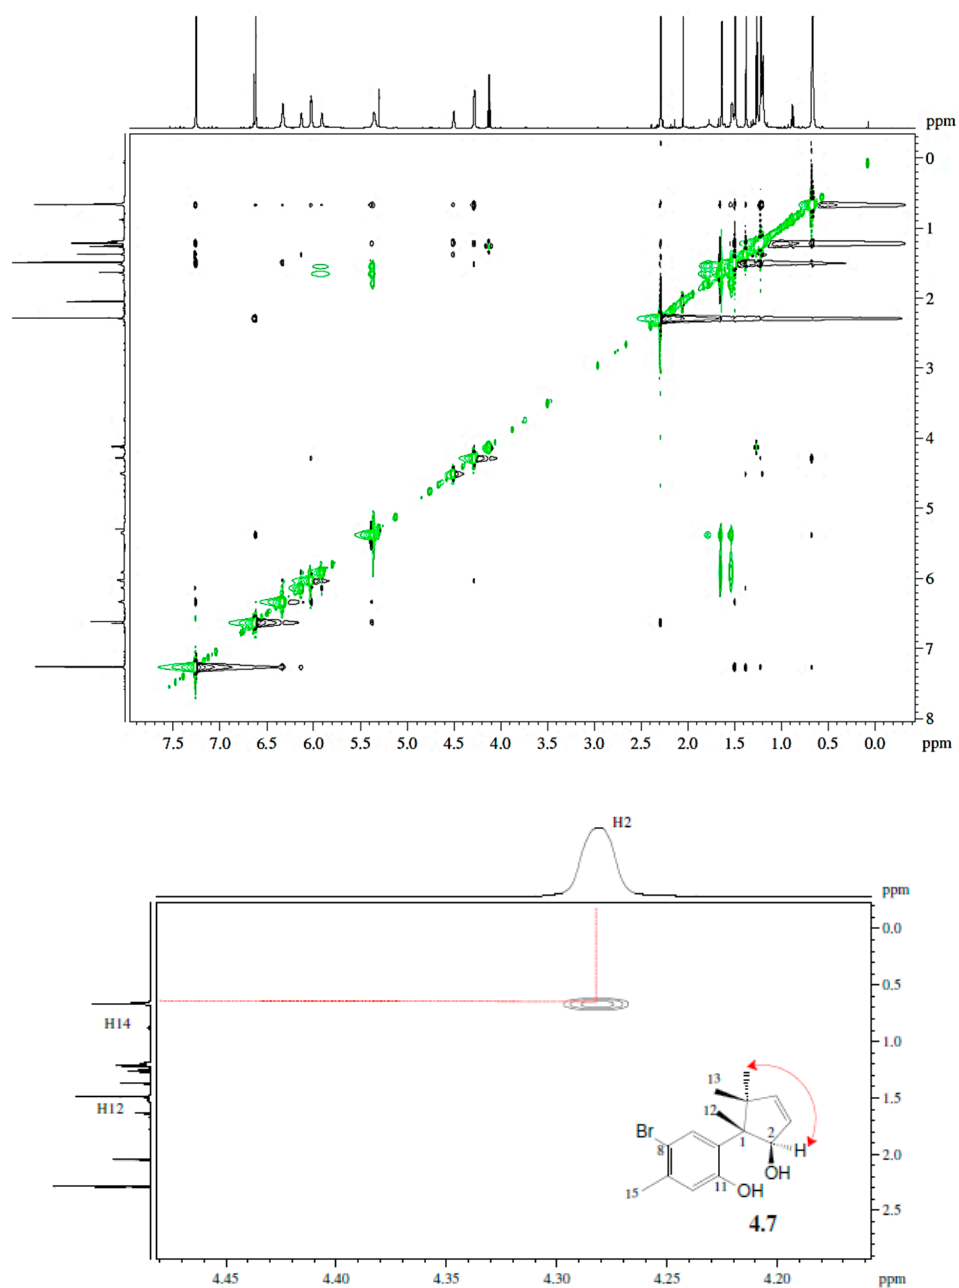

Figure S40. NOESY NMR spectrum ( $\text{CDCl}_3$ , 600 MHz) of compound 6.

## 1.8 Compound 7

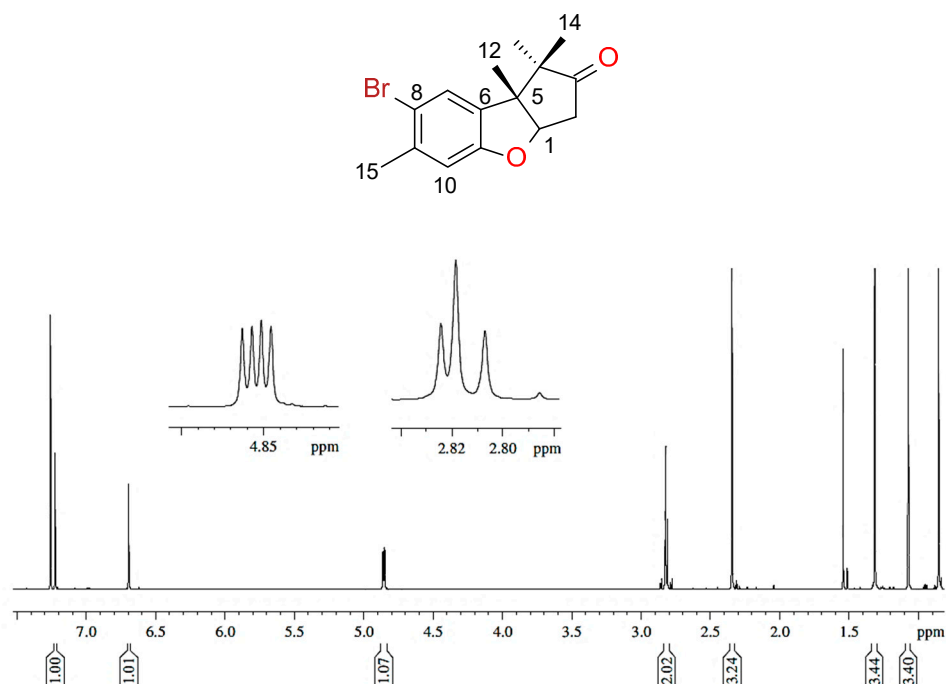Figure S41.  $^1\text{H}$  NMR spectrum ( $\text{CDCl}_3$ , 600 MHz) of compound 7.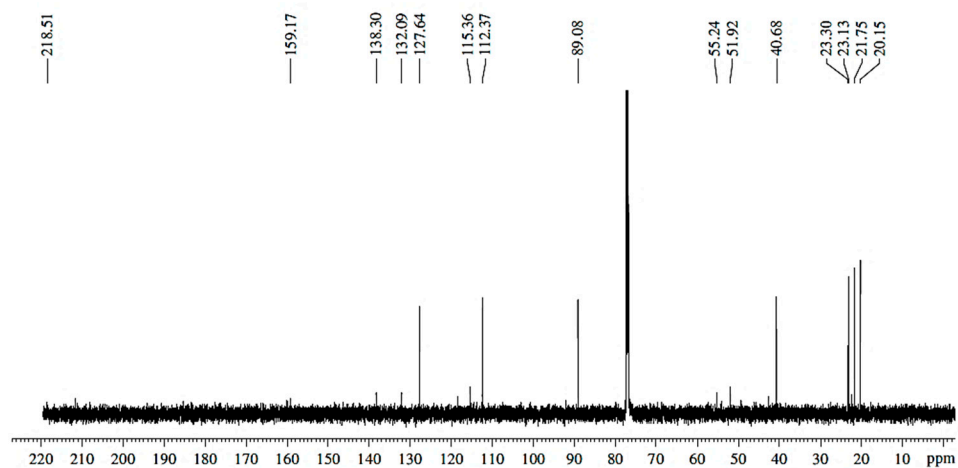Figure S42.  $^{13}\text{C}$  NMR spectrum ( $\text{CDCl}_3$ , 150 MHz) of compound 7.

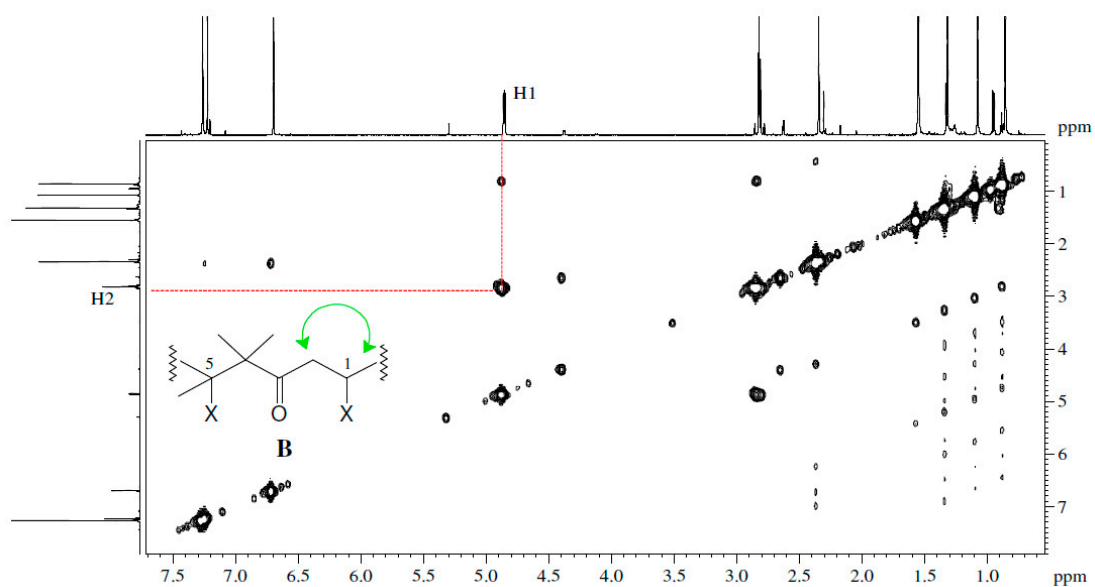

Figure S43. COSY NMR spectrum (CDCl<sub>3</sub>, 600 MHz) of compound 7.

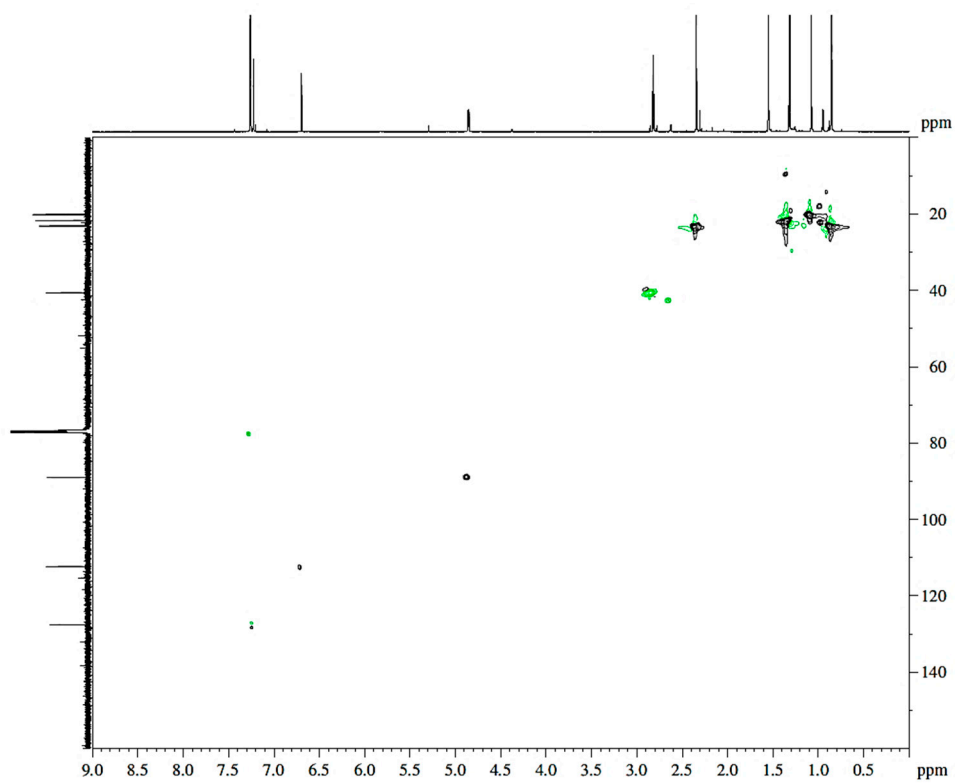

Figure S44. HSQC NMR spectrum (CDCl<sub>3</sub>, 600 MHz) of compound 7.

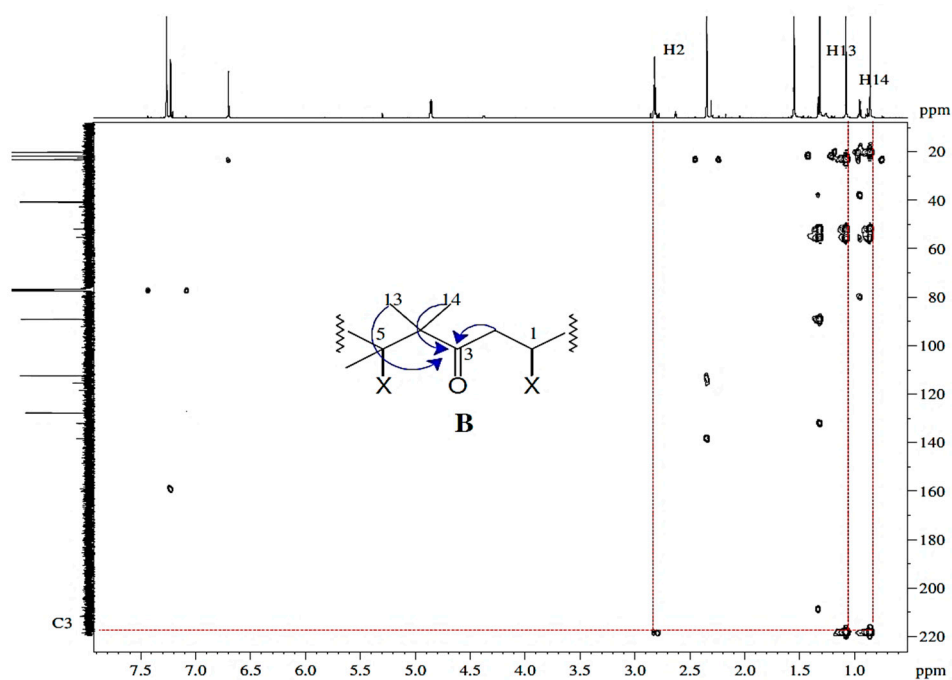

Figure S45. HMBC NMR spectrum (CDCl<sub>3</sub>, 600 MHz) of compound 7.

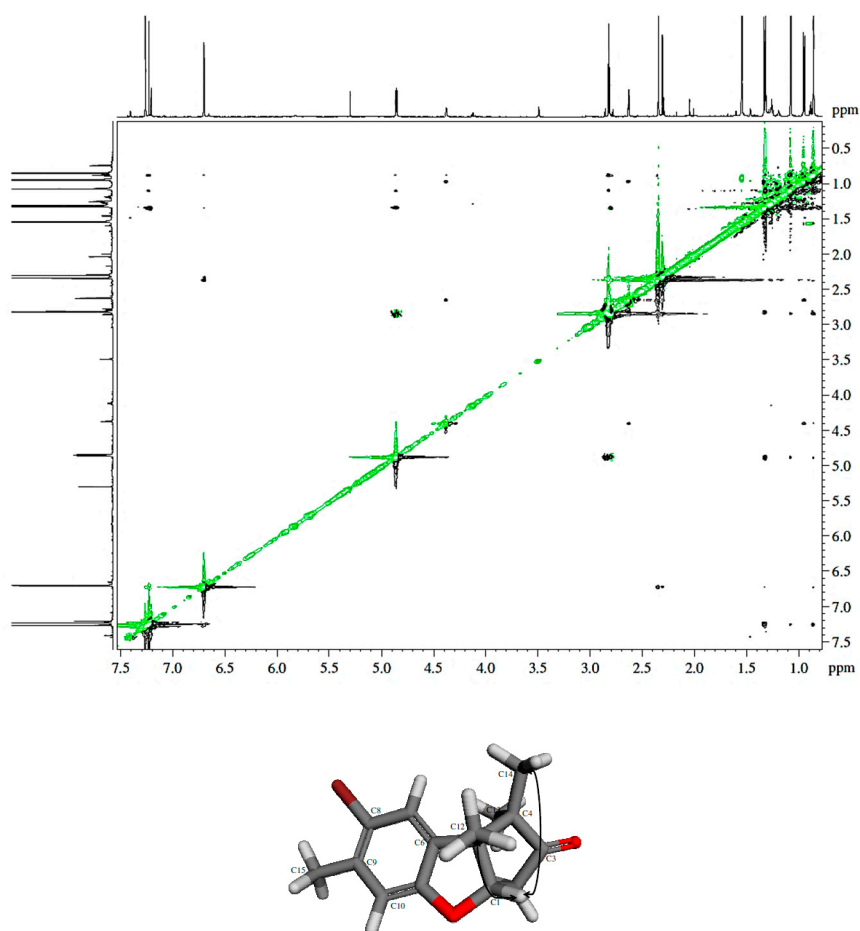

Figure S46. NOESY NMR spectrum (CDCl<sub>3</sub>, 600 MHz) and key NOESY correlations for compound 7.



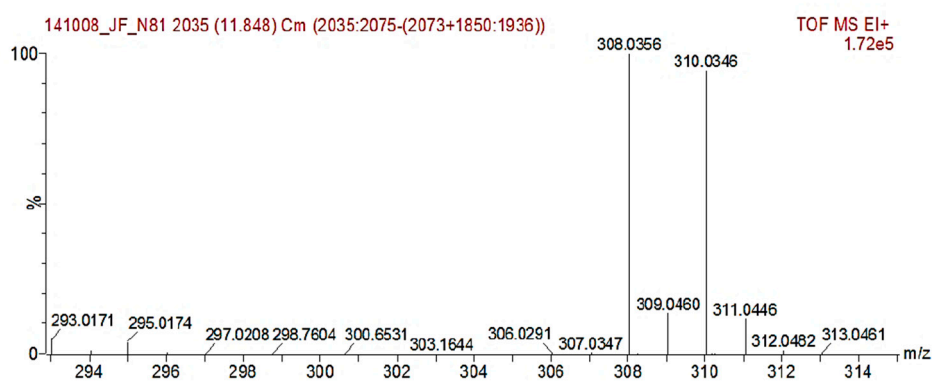

Figure S47. HRGCEIMS spectrum of compound 7.

## 1.9 Compound 8

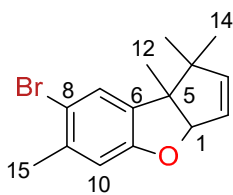

Table S6. NMR spectroscopic data of compound 8.

| Carbon No | $\delta_C^\#$ | $\delta_C$ mult | $\delta_H$ , mult, $J$ (Hz) |
|-----------|---------------|-----------------|-----------------------------|
| 1         | 99.3          | CH              | 5.28, d, 1.8                |
| 2         | 124.8         | CH              | 5.62, dd, 5.8, 1.8          |
| 3         | 147.6         | CH              | 5.81, d, 5.8                |
| 4         | 52.0          | C               | -                           |
| 5         | 54.7          | C               | -                           |
| 6         | 133.8         | C               | -                           |
| 7         | 129.0         | CH              | 7.24, s                     |
| 8         | 113.1         | C               | -                           |
| 9         | 138.1         | C               | -                           |
| 10        | 112.1         | CH              | 6.66, s                     |
| 11        | 157.8         | C               | -                           |
| 12        | 22.3          | CH <sub>3</sub> | 1.33, s                     |
| 13        | 26.9          | CH <sub>3</sub> | 1.07, s                     |
| 14        | 27.1          | CH <sub>3</sub> | 1.13, s                     |
| 15        | 23.1          | CH <sub>3</sub> | 2.31, s                     |

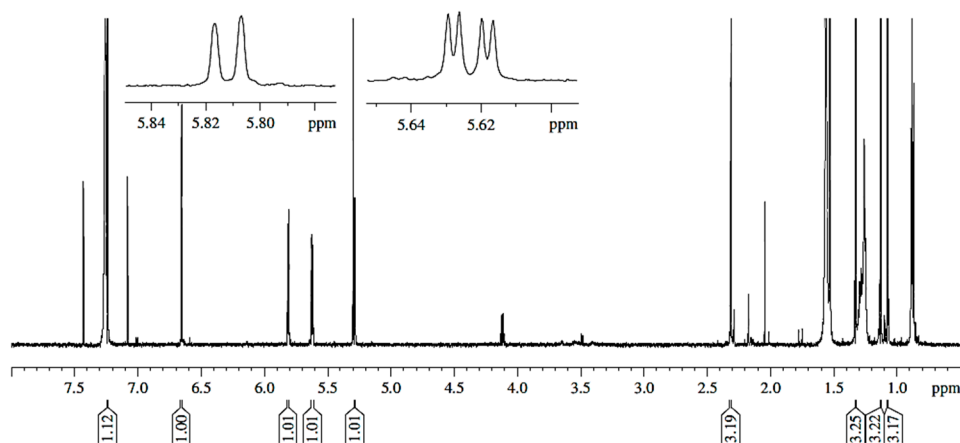Figure S48. <sup>1</sup>H NMR spectrum (CDCl<sub>3</sub>, 600 MHz) of compound 8.
